# Supplementary material for: Barriers to and facilitators of hormonal and long-acting reversible contraception access and use in the US among reproductive-aged women who use opioids: A scoping review
Source: PubMed Central journal article supplement — Prev Med Rep. 2023 Jan 18;32:102111. doi: 10.1016/j.pmedr.2023.102111 (PMC9898069; doi:10.1016/j.pmedr.2023.102111), 2023-01-18
Supplement: mmc1.pdf [file mmc1.pdf]

**Appendix A. Preferred Reporting Items for Systematic reviews and Meta-Analyses (PRISMA) extension for Scoping Reviews (PRISMA-ScR) and Searches (PRISMA-S) Checklists**

| SECTION                                               | ITEM | PRISMA-ScR CHECKLIST ITEM                                                                                                                                                                                                                                                                                  | REPORTED ON PAGE #                                                              |
|-------------------------------------------------------|------|------------------------------------------------------------------------------------------------------------------------------------------------------------------------------------------------------------------------------------------------------------------------------------------------------------|---------------------------------------------------------------------------------|
| <b>TITLE</b>                                          |      |                                                                                                                                                                                                                                                                                                            |                                                                                 |
| Title                                                 | 1    | Identify the report as a scoping review.                                                                                                                                                                                                                                                                   | p. 1                                                                            |
| <b>ABSTRACT</b>                                       |      |                                                                                                                                                                                                                                                                                                            |                                                                                 |
| Structured summary                                    | 2    | Provide a structured summary that includes (as applicable): background, objectives, eligibility criteria, sources of evidence, charting methods, results, and conclusions that relate to the review questions and objectives.                                                                              | p. 2                                                                            |
| <b>INTRODUCTION</b>                                   |      |                                                                                                                                                                                                                                                                                                            |                                                                                 |
| Rationale                                             | 3    | Describe the rationale for the review in the context of what is already known. Explain why the review questions/objectives lend themselves to a scoping review approach.                                                                                                                                   | pp. 3-4                                                                         |
| Objectives                                            | 4    | Provide an explicit statement of the questions and objectives being addressed with reference to their key elements (e.g., population or participants, concepts, and context) or other relevant key elements used to conceptualize the review questions and/or objectives.                                  | p. 4                                                                            |
| <b>METHODS</b>                                        |      |                                                                                                                                                                                                                                                                                                            |                                                                                 |
| Protocol and registration                             | 5    | Indicate whether a review protocol exists; state if and where it can be accessed (e.g., a Web address); and if available, provide registration information, including the registration number.                                                                                                             | p. 4 (Methods – Design)                                                         |
| Eligibility criteria                                  | 6    | Specify characteristics of the sources of evidence used as eligibility criteria (e.g., years considered, language, and publication status), and provide a rationale.                                                                                                                                       | pp. 4-5 (Methods – Eligibility criteria)                                        |
| Information sources*                                  | 7    | Describe all information sources in the search (e.g., databases with dates of coverage and contact with authors to identify additional sources), as well as the date the most recent search was executed.                                                                                                  | p. 5 (Methods – Search strategy and supplemental file)                          |
| Search                                                | 8    | Present the full electronic search strategy for at least 1 database, including any limits used, such that it could be repeated.                                                                                                                                                                            | p. 5 (Methods – Search strategy and supplemental file)                          |
| Selection of sources of evidence†                     | 9    | State the process for selecting sources of evidence (i.e., screening and eligibility) included in the scoping review.                                                                                                                                                                                      | p. 6 ((Methods – Study screening and selection)                                 |
| Data charting process‡                                | 10   | Describe the methods of charting data from the included sources of evidence (e.g., calibrated forms or forms that have been tested by the team before their use, and whether data charting was done independently or in duplicate) and any processes for obtaining and confirming data from investigators. | p. 6 ((Methods – Data extraction)                                               |
| Data items                                            | 11   | List and define all variables for which data were sought and any assumptions and simplifications made.                                                                                                                                                                                                     | pp. 4-6 (Methods – Eligibility criteria, data extraction and supplemental file) |
| Critical appraisal of individual sources of evidence§ | 12   | If done, provide a rationale for conducting a critical appraisal of included sources of evidence; describe the methods used and how this information was used in any data synthesis (if appropriate).                                                                                                      | N/A                                                                             |
| Synthesis of results                                  | 13   | Describe the methods of handling and summarizing the data that were charted.                                                                                                                                                                                                                               | pp. 6-7 (Methods – Framework analysis)                                          |
| <b>RESULTS</b>                                        |      |                                                                                                                                                                                                                                                                                                            |                                                                                 |

| SECTION                                       | ITEM | PRISMA-ScR CHECKLIST ITEM                                                                                                                                                                       | REPORTED ON PAGE #               |
|-----------------------------------------------|------|-------------------------------------------------------------------------------------------------------------------------------------------------------------------------------------------------|----------------------------------|
| Selection of sources of evidence              | 14   | Give numbers of sources of evidence screened, assessed for eligibility, and included in the review, with reasons for exclusions at each stage, ideally using a flow diagram.                    | p. 7 and supplemental file       |
| Characteristics of sources of evidence        | 15   | For each source of evidence, present characteristics for which data were charted and provide the citations.                                                                                     | p. 7 and Table 1                 |
| Critical appraisal within sources of evidence | 16   | If done, present data on critical appraisal of included sources of evidence (see item 12).                                                                                                      | N/A                              |
| Results of individual sources of evidence     | 17   | For each included source of evidence, present the relevant data that were charted that relate to the review questions and objectives.                                                           | pp. 10-19 and Table 2            |
| Synthesis of results                          | 18   | Summarize and/or present the charting results as they relate to the review questions and objectives.                                                                                            | pp. 10-19, Figure 2, and Table 2 |
| <b>DISCUSSION</b>                             |      |                                                                                                                                                                                                 |                                  |
| Summary of evidence                           | 19   | Summarize the main results (including an overview of concepts, themes, and types of evidence available), link to the review questions and objectives, and consider the relevance to key groups. | pp. 20-21                        |
| Limitations                                   | 20   | Discuss the limitations of the scoping review process.                                                                                                                                          | p. 22                            |
| Conclusions                                   | 21   | Provide a general interpretation of the results with respect to the review questions and objectives, as well as potential implications and/or next steps.                                       | p. 23                            |
| <b>FUNDING</b>                                |      |                                                                                                                                                                                                 |                                  |
| Funding                                       | 22   | Describe sources of funding for the included sources of evidence, as well as sources of funding for the scoping review. Describe the role of the funders of the scoping review.                 | p. 23 (N/A)                      |

JBI = Joanna Briggs Institute; PRISMA-ScR = Preferred Reporting Items for Systematic reviews and Meta-Analyses extension for Scoping Reviews.

\* Where *sources of evidence* (see second footnote) are compiled from, such as bibliographic databases, social media platforms, and Web sites.

† A more inclusive/heterogeneous term used to account for the different types of evidence or data sources (e.g., quantitative and/or qualitative research, expert opinion, and policy documents) that may be eligible in a scoping review as opposed to only studies. This is not to be confused with *information sources* (see first footnote).

‡ The frameworks by Arksey and O'Malley (6) and Levac and colleagues (7) and the JBI guidance (4, 5) refer to the process of data extraction in a scoping review as data charting.

§ The process of systematically examining research evidence to assess its validity, results, and relevance before using it to inform a decision. This term is used for items 12 and 19 instead of "risk of bias" (which is more applicable to systematic reviews of interventions) to include and acknowledge the various sources of evidence that may be used in a scoping review (e.g., quantitative and/or qualitative research, expert opinion, and policy document).

Source: Tricco AC, Lillie E, Zarin W, O'Brien KK, Colquhoun H, Levac D, et al. PRISMA Extension for Scoping Reviews (PRISMA ScR): Checklist and Explanation. *Ann Intern Med.* 2018;169:467–473. doi: 10.7326/M18-0850.

| Section/topic                          | # | PRISMA-S Checklist item                                                                                                                | Location(s) Reported             |
|----------------------------------------|---|----------------------------------------------------------------------------------------------------------------------------------------|----------------------------------|
| <b>INFORMATION SOURCES AND METHODS</b> |   |                                                                                                                                        |                                  |
| Database name                          | 1 | Name each individual database searched, stating the platform for each.                                                                 | p. 5 (Methods – Search strategy) |
| Multi-database searching               | 2 | If databases were searched simultaneously on a single platform, state the name of the platform, listing all of the databases searched. | N/A                              |
| Study registries                       | 3 | List any study registries searched.                                                                                                    | N/A                              |

|                               |    |                                                                                                                                                                                                                                                                    |                                                        |
|-------------------------------|----|--------------------------------------------------------------------------------------------------------------------------------------------------------------------------------------------------------------------------------------------------------------------|--------------------------------------------------------|
| Online resources and browsing | 4  | Describe any online or print source purposefully searched or browsed (e.g., tables of contents, print conference proceedings, web sites), and how this was done.                                                                                                   | N/A                                                    |
| Citation searching            | 5  | Indicate whether cited references or citing references were examined, and describe any methods used for locating cited/citing references (e.g., browsing reference lists, using a citation index, setting up email alerts for references citing included studies). | N/A                                                    |
| Contacts                      | 6  | Indicate whether additional studies or data were sought by contacting authors, experts, manufacturers, or others.                                                                                                                                                  | N/A                                                    |
| Other methods                 | 7  | Describe any additional information sources or search methods used.                                                                                                                                                                                                | p. 6 (Methods – Study screening and selection)         |
| <b>SEARCH STRATEGIES</b>      |    |                                                                                                                                                                                                                                                                    |                                                        |
| Full search strategies        | 8  | Include the search strategies for each database and information source, copied and pasted exactly as run.                                                                                                                                                          | Supplemental file                                      |
| Limits and restrictions       | 9  | Specify that no limits were used, or describe any limits or restrictions applied to a search (e.g., date or time period, language, study design) and provide justification for their use.                                                                          | p. 5 (Methods – Search strategy) and supplemental file |
| Search filters                | 10 | Indicate whether published search filters were used (as originally designed or modified), and if so, cite the filter(s) used.                                                                                                                                      | N/A                                                    |
| Prior work                    | 11 | Indicate when search strategies from other literature reviews were adapted or reused for a substantive part or all of the search, citing the previous review(s).                                                                                                   | N/A                                                    |
| Updates                       | 12 | Report the methods used to update the search(es) (e.g., rerunning searches, email alerts).                                                                                                                                                                         | N/A                                                    |
| Dates of searches             | 13 | For each search strategy, provide the date when the last search occurred.                                                                                                                                                                                          | Supplemental file                                      |
| <b>PEER REVIEW</b>            |    |                                                                                                                                                                                                                                                                    |                                                        |
| Peer review                   | 14 | Describe any search peer review process.                                                                                                                                                                                                                           | p. 5 (Methods)                                         |
| <b>MANAGING RECORDS</b>       |    |                                                                                                                                                                                                                                                                    |                                                        |
| Total Records                 | 15 | Document the total number of records identified from each database and other information sources.                                                                                                                                                                  | p. 7 (Results)                                         |
| Deduplication                 | 16 | Describe the processes and any software used to deduplicate records from multiple database searches and other information sources.                                                                                                                                 | p. 5 (Methods – Search strategy)                       |

PRISMA-S: An Extension to the PRISMA Statement for Reporting Literature Searches in Systematic Reviews  
Rethlefsen ML, Kirtley S, Waffenschmidt S, Ayala AP, Moher D, Page MJ, Koffel JB, PRISMA-S Group.  
Last updated February 27, 2020.

## Appendix B. Search strategies

Search strategies for Scoping Review Contraception and Opioid Use 2021-10

Eight databases: includes database name (platform) and date ran.

Medline (Ovid) 1990-2021, Embase (Elsevier) 1990-2021, CINAHL Complete (Ebscohost) 1990-2021, Cochrane Library (Wiley) 1990-2021, Academic Search Ultimate (Ebscohost) 1990-2021, PsycINFO (Ebscohost) 1990-2021, Scopus (scopus.com) 1990-2021, and Web of Science Core Collection (Clarivate) 1990-2021. Note: Sociological Abstracts (ProQuest) 1990- 2021 was listed in our protocol, but results not included due to technical difficulties with database export.

### **Ovid MEDLINE(R)** August 3, 2021

Field tags: / = Medical Subject Heading | .ti,ab,kf,kw. = title, abstract, keyword, keywords assigned by indexers or authors

1 contraceptive agents, female/ or levonorgestrel/ or medroxyprogesterone acetate/ or norethindrone acetate/ or contraceptives, oral/ or contraceptives, oral, combined/ or ethinyl estradiol-norgestrel combination/ or contraceptives, oral, hormonal/ or algestone/ or chlormadinone acetate/ or desogestrel/ or dimethisterone/ or ethinyl estradiol/ or ethynodiol diacetate/ or gestrinone/ or lynestrenol/ or medroxyprogesterone/ or megestrol/ or mestranol/ or norethindrone/ or norethynodrel/ or norgestrel/ or contraceptives, oral, sequential/ or contraceptives, oral, synthetic/ or algestone acetophenide/ or mifepristone/ or norgestrienone/ or contraceptives, postcoital/ or contraceptives, postcoital, hormonal/ or contraceptives, postcoital, synthetic/ or centchroman/ or luteolytic agents/ or cloprostenol/ or triptorelin pamoate/ or menstruation-inducing agents/ or sperm immobilizing agents/ or spermaticidal agents/ or nonoxynol/ or octoxynol/ [female contraceptive agents MESH terms] (69567)

2 contraceptive devices, female/ or condoms, female/ or intrauterine devices, medicated/ or intrauterine devices, copper/ [female contraceptive devices MeSH terms] (5748)

3 ("4 diisobutylphenoxypolyethoxyethanol" or aborti\* or algestone or alpagelle or anordiol or anordrin or anticonceptive or antifertility or anti-fertility or "benzethonium chloride plus nonoxinol 9" or "birth control" or "Bisecurin I" or "camphor plus eucalyptus oil plus gum benzoin plus menthol plus polidocanol" or "carbopol 974p" or "cellulose sulfate" or centchroman or "Cervical Cap\*" or chlormadinone or "chorionic gonadotropin vaccine\*" or "citric acid plus lactic acid plus potassium bitartrate" or Cloprostenol or "Coiled Spring\*" or "Coitus Interruptus" or "conjugated estrogen\*" or contraception\* or contraceptiv\* or CycloProvera or Cyklabil or Deposiston or desogestrel or "diallyl disulfide" or "diallyl trisulfide" or diethylstilbestrol or dimethisterone or "drospirenone plus ethinylestradiol" or embryotom\* or emmenagogue\* or "estradiol enanthate" or "estradiol plus nomegestrol acetate" or "estradiol valerate plus norethisterone enantate" or estropipate or "Ethinyl Estradiol" or "Ethinodiol Diacetate" or ethinylestradiol or etonogestrel or "etynodiol diacetate plus mestranol" or "female sterilization\*" or "female sterilisation\*" or Femovan or fluprostenol or Gestodene or Gestrinone or immunoconcepti\* or Infecundin or "Intrauterine Device\*" or "IUD" or "IUDs" or kentsin or korlym or "levonorgestrel" or Ionidamine or "Luteolytic Agent\*" or "lynestrenol" or Megestrol or "menfegol" or "menstruation inducing agent\*" or "Menstruation-Inducing Agent\*" or mestranol or Mifegyne or Mifeprex or Mifepristone or "morning after pill" or "neem oil" or Non-Ovlon or "Nonidet P-40" or Nonoxynol or Noracycline or norelgestromin or Norethindrone or norethisterone or Norethynodrel or norgestimate or norgestrel or Norgestrienone or Norinyl or NuvaRing or octoxinol or Octoxynol or ormeloxifene or " Ortho Evra" or "ortho 777" or Oviol or "Ovulation Inhibition" or Plumbagin or paraformaldehyde or polidocanol or "postcoit\* pill" or "progestin implant\*" or "ring pessar\*" or " SC-11800 EE" or segesterone or "shelf pessar\*" or "Sperm Immobilizing Agent\*" or " ST 1435" or sulprostone or tanaproget or trestolone or "Triptorelin Pamoate" or Trisequens or tristep or "triton x 100" or "tubal occlusion" or ulipristal or yuehchukene or ((spermicidal or spermaticidal) adj3 agent\*) or (vagina\* adj3 (diaphragm\* or ring\* or shield\* or sponge\* or pessar\*)) or (prevent\* adj3 pregnan\*) or Alesse or Apri or Aranelle or Aviane or Azurette or Balziva or Beyaz or Brevicon or Camrese or Cesia or Cryselle or Cyclessa or Demulen or Desogen or Enpresse or Estrostep or Femcon or Gianvi or Jolessa or Junel or Kariva or Kelnor or Leena or Lessina or Levlen or Levlite or Levora or "Lo/Ovral" or Loestrin or Loryna or LoSeasonique or Low-Ogestrel or Lutera or Lybrel or Microgestin or Min-Ovral or Mircette or Modicon or MonoNessa or Natazia or Necon or Nordette or Norinyl or Nortrel or Ocella or Ogestrel or "Ortho Tri-Cyclen" or "Ortho-Cept" or "Ortho-Cyclen" or "Ortho-Novum" or "Ovcon" or "Portia" or "Previfem" or Quasense or Reclipsen or Safyral or Seasonale or Seasonique or Solia or Sprintec or Sronyx or Syeda or Tilia or "Tri-Legest" or "TriNessa" or Tri-Norinyl or Triphasil or Tri-Previfem or Triquilar or Tri-Sprintec or Trivora or Velivet or Yasmin or Yaz or Zarah or Zenchent or Zeosa or Zovia or Camila or Errin or Heather or Jolivette or Micronor or "Nor-Q.D." or Ovrette or "birth-control" or minipill or norethindrone or norgestrel).ti,ab,kw.

[contraception keyword terms set 1] (200390)

- 4 (anticonception or antioovulat\* or ((birth or fertility or population) adj1 control) or "family planning" or immunocontracepti\* or ((block\* or inhibit\* or prevent\*) adj1 (fertilization or fertilisation)) or LARCs or "long acting reversible contracepti\*" or "reversible long-acting contracepti\*" or (ovulation adj1 (block\* or inhibit\* or suppression)) or ((female or reproductive) adj2 sterilization) or "intrauterine device\*" or ((contraceptive or copper\* or hormon\* or unmedicated) adj1 (IUD or IUDs)).ti,ab,kw. [female contraception keyword terms set 3] (62646)
- 5 or/1-4 [female contraception set] (247603)
- 6 contraception/ or coitus interruptus/ or contraception, barrier/ or contraception, immunologic/ or contraception, postcoital/ or contraceptive effectiveness/ or hormonal contraception/ or long-acting reversible contraception/ or natural family planning methods/ or ovulation inhibition/ or sterilization, reproductive/ [contraception MESH terms] (27719)
- 7 contraceptive agents/ or contraceptive agents, hormonal/ or algestone acetophenide/ or levonorgestrel/ or medroxyprogesterone acetate/ or norethindrone acetate/ or contraceptives, oral, hormonal/ or algestone/ or chlormadinone acetate/ or desogestrel/ or dimethisterone/ or ethinyl estradiol/ or ethinyl estradiol-norgestrel combination/ or ethynodiol diacetate/ or gestrinone/ or lynestrenol/ or medroxyprogesterone/ or megestrol/ or mestranol/ or norethindrone/ or norethynodrel/ or norgestrel/ or contraceptives, postcoital, hormonal/ or luteolytic agents/ or cloprostenol/ or mifepristone/ or triptorelin pamoate/ or menstruation-inducing agents/ [contraceptive agents MESH terms] (44099)
- 8 Reproductive Control Agents/ [MESH term] (514)
- 9 abortifacient agents/ or abortifacient agents, nonsteroidal/ or carboprost/ or dinoprost/ or methotrexate/ or misoprostol/ or trichosanthin/ or abortifacient agents, steroidal/ or mifepristone/ [abortifacient agents MESH terms] (61694)
- 10 contraceptive devices/ or Vaccines, Contraceptive/ [contraceptive devices MESH terms] (1796)
- 11 (antifertility or "Antispermatogetic Agent\*" or "coitus interruptus" or condom\* or contraceptive\* or contraception\* or "cyproterone acetate" or dienogest or Gossypol or Ionidamine or medroxyprogesterone or molinate or "p-coumaric acid" or triptolide or "intra-vascular thread" or "reproductive right").ti,ab,kw. [contraceptive keyword terms set 1] (106407)
- 12 or/6-11 [contraception/contraceptive set] (193679)
- 13 reproductive behavior/ or contraception behavior/ or ((contracepti\* or reproduct) adj2 (behavior\* or behaviour\* or complian\* or method\* or usage\* or "use")).ti,ab,kw. [contraception behavior set] (28853)
- 14 or/12-13 [contraception/contraceptive,behavior set] (195400)
- 15 females/ or (female\* or woman\* or women\* or maternal\* or mother\* or girl\* or pregnan\*).ti,ab,kw,kf. [female set 1] (9636779)
- 16 males/ not (males/ and females/) [female set 2] (2853497)
- 17 5 or ((12 or 14) and 15) or ((12 or 14) not 16) [Female contraception/contraceptive set ] (320420)
- 18 narcotic-related disorders/ or opioid-related disorders/ or heroin dependence/ or morphine dependence/ or opiate overdose/ or opium dependence/ [OUD MeSH terms] (29250)
- 19 ((opioid\* or opiate\* or heroin or morphine\* or narcotic\* or opium\*) adj2 (abuse\* or addict\* or dependenc\* or disorder\* or habit\* or misuse\* or overdos\* or problem\* or use\* or usage\*)).ti,ab,kw. [OUD Keyword terms] (42495)
- 20 or/18-19 [OUD subset] (55031)
- 21 analgesics, opioid/ or narcotics/ or alfentanil/ or alphaprodine/ or buprenorphine/ or buprenorphine, naloxone drug combination/ or butorphanol/ or codeine/ or dextromoramide/ or dextropropoxyphene/ or dihydromorphine/ or diphenoxylate/ or "enkephalin, ala(2)-mephe(4)-gly(5)-"/ or "enkephalin, d-penicillamine (2,5)-"/ or ethylketocyclazocine/ or ethylmorphine/ or etorphine/ or fentanyl/ or heroin/ or hydrocodone/ or hydromorphone/ or levorphanol/ or meperidine/ or meptazinol/ or methadone/ or methadyl acetate/ or morphine/ or nalbuphine/ or opiate alkaloids/ or opium/ or oxycodone/ or oxymorphone/ or pentazocine/ or phenazocine/ or phenoperidine/ or pirinitramide/ or promedol/ or sufentanil/ or tilidine/ or tramadol/ [opioids MeSH terms] (128772)
- 22 ("6029 m" or 6029m or acemethadone or acetylmethadol or adolonta or alfenta or Alfentanil or alfentanyl or algonan or alphacetylmethadol or Alphaprodine or amadol or amidone or amidolacetate or "apo-butorphanol" or ardinex or "bc 2627" or "bc-2627" or bc2627 or beforal or beta-casomorphins or "beta casomorphins" or biodalgin or biodone or biokanol or biopon or Buprenorphine or buprenex or buprex or Butorphanol or carfentanil or Codeine or codinovo or cofapon or contramal or dago or dagol or damge or damgo or demerol or dermorphin or desomorphine or Dextromoramide or Dextropropoxyphene or dezocine or diacetylmorphine or diagesil or diamorf or diamorphine or dicodid or dihydrocodeinone or dihydrocodeine or dihydrohydroxycodone or dihydron or Dihydromorphine or dihydromorphinone or dilaudid or dimepheptanol or dimethylmeperidine or dinarkon or

dionine or Diphenoxylate or dipidolor or dipydolor or "d moramide" or "d-moramide" or dolantin or dolargan or dolcontral or dolin or dolophine or dolorex or dolosal or dolsin or dpdpe or dplpe or duragesic or duramorph or durogesic or "en 2234a" or "en-2234a" or en2234a or endomorphin or Enkephalin or eseroline or ethylketazocine or Ethylketocyclazocine or Ethylmorphine or Etorphine or ethorphine or eucodal or fanaxal or fenoperidine or fentanest or Fentanyl or fentora or fortral or "go 1261" or "go-1261" or go1261 or Heroin or hycodan or hycon or hydrocodeinonebitartrate or hydrocodon or Hydrocodone or hydromorphon or Hydromorphone isocodeine or isonipeccain or isopromedol or jutadol or "k 315" or "k-315" or k315 or ketobemidone or laam or laudacon or laudanon or laudanum or "l dromoran" or "l-dromoran" or lealgin or levoacetylmethadol or levomethadyl or "levo dromoran" or "levo-dromoran" or levodromoran or levodroman or levorphan or Levorphanol or lexis or lidol or limifen or lofentanil or lydol or m99 or Meperidine or Meptazinol or meptid or metadol or metasedin or methaddict or methadol or methadyl or "Methadyl Acetate" or methylmorphinan or Methadone or methadose or methex or moradol or Morphine or morphines or morphia or "ms contin" or "mtw tramadol" or "mtw-tramadol" or "mtwtramadol" or Nalbuphine or narcotic\* or narphen or nepenthe or nisentil or "n methylmorphine" or "n-methylmorphine" or nobligan or nocistatin or normethadone or nubain or numorphan or omnopon or opana or operidine or opial or opioid\* or opioid\* or opiate\* or Opium\* or operidine or opon or oposal or orlaam or oxiconum or oxycodone or Oxycodone or Oxymorphone or oxycone or oxycontin or palfium or palladone or pancodine or papaveretum or pantopon\* or paramorfan or paramorphan or pavon or Pentazocine or pethidine or phenadone or Phenazocine or phenbenzorphin or phenethylazocine or Phenoperidine or phentanyl or phymet or physeptone or pinadone or Pirinitramide or piritramid or piritramide or prefin or prodine or propoxyphene or Promedol or prontofort or protopine or pyrrolamidol or "r 1406" or "r-1406" or r1406 or "r 30730" or "r-30730" or r30730 or "r 39209" or "r-39209" or r39209 or "r 4263" or "r-4263" or r4263 or "ranitidin 1a pharma" or rapifen or remifentanil or "rx 6029 m" or rx6029m or "rx 783006" or "rx-783006" or stadol or sublimaze or suboxone or sufenta or Sufentanil or sufentanilhameln or sufentanilratiopharm or sulfentanil or sulfentanyl or symoron or talwin or takadol or temgesic or tetrapon or theocodin or theradol or tilidate or tilidin or Tilidine or tiral or topalgic or torbugesic or tradol or tradolpuren or tradonal or tralgiol or "trama 1a pharma" or "trama abz" or "trama dorsch" or "trama kd" or "trama-dorsch" or tramadorsch or tramabeta or tramadin or tramadoc or Tramadol or tramadoldolgit or tramadolhameln or tramadololor or tramadolratiopharm or tramadura or tramagetic or tramagit or tramake or tramal or tramex or tramundin or trasedal or trimeperidine or ultram or valerone or valerone or "win 35197 2" or "win-35197-2" or win351972 or "wy 22811" or "wy-22811" or wy22811 or "xymel 50" or zamudol or zumalgic or zydol or zytram).ti,ab. or (opioid\* or opium or heroin or morphine).kf,nm. [opioids Keyword terms] (229780)

23 Opiate Alkaloids/ or morphinans/ or benzomorphans/ or pentazocine/ or phenazocine/ or buprenorphine/ or buprenorphine, naloxone drug combination/ or butorphanol/ or dextromethorphan/ or dextrorphan/ or diprenorphine/ or etorphine/ or levallorphan/ or levorphanol/ or morphine derivatives/ or codeine/ or dihydromorphine/ or ethylmorphine/ or heroin/ or hydromorphone/ or morphine/ or oxymorphone/ or thebaine/ or nalbuphine/ or nalorphine/ or naloxone/ or naltrexone/ or noscapine/ or papaverine/ or pilocarpine/ [opiate MeSH terms] (93927)

24 ("Opiate Alkaloids" or Morphinans or Benzomorphans or Benzomorphan or Pentazocine or fortral or lexis or talwin or Phenazocine or narphen or phenbenzorphin or phenethylazocine or Buprenorphine or "6029 m" or 6029m or buprenex or buprex or prefin or "rx 6029 m" or rx6029m or temgesic or suboxone or Butorphanol or "apo-butorphanol" or "bc 2627" or "bc-2627" or bc2627 or beforal or dolorex or moradol or stadol or torbugesic or Dextromethorphan or delysym or levomethorphan or racemethorphan or "d-methorphan" or "l-methorphan" or Dextrorphan or methylmorphinan or Diprenorphine or revivon or Etorphine or ethorphine or m66 or Levallorphan or lorfan or naloxiphan or Levorphanol or "l dromoran" or "l-dromoran" or "levo dromoran" or "levo-dromoran" or levodromoran or levodroman or levorphan or "Morphine Derivatives" or Codeine or ardinex or isocodeine or "n methylmorphine" or "n-methylmorphine" or Hydrocodone or codinovo or dicodid or dihydrocodeinone or hycodan or hycon or hydrocodeinonebitartrate or hydrocodon or Oxycodone or dihydrohydroxycodone or dihydrone or dinarkon or eucodal or oxiconum or oxycodone or oxycone or oxycontin or pancodine or theocodin or Dihydromorphine or paramorfan or paramorphan or Ethylmorphine or dionine or ethomorphine or ethylmorphine or Heroin or diacetylmorphine or diagesil or diamorf ordiamorphine or Hydromorphone or dihydromorphinone or dilaudid or hydromorphon or hydromorphone or laudacon or palladone or Morphine or morphia or "ms contin" or duramorph or Oxymorphone or numorphan or opana or Thebaine or Nalbuphine or "en 2234a" or "en-2234a" or en2234a or nubain or Nalorphine or allylnormorphine or lethidrone or Naloxone or Nalone or Naloxon or Narcan or Narcanti or "mrz 2593" or "mrz 2593 br" or "mrz 2593-br" or "mrz 2593br" or "mrz-2593" or "mrz2593" or Naltrexone or antaxone or celupan or "en 1639a" or "en-1639a" or en1639a or nalorex or nemexin or revia or trexan or Noscapine or capval or "librochin prikkelhoest" or narcotine or noscapect or tuscalman or Papaverine or

cerespan or pavabid or pavatym or pilocarpine or isopilocarpine or isoptocarpine or ocuserit or salagen).ti,ab.  
 [opiate Keyword terms] (117000)  
 25 or/20-24 [OUD,opioid,opiate subset ] (268467)  
 26 \*Substance-Related Disorders/ [SUD MeSH term,focused not exploded] (72266)  
 27 or/25-26 [OUD/opioid set ] (327484)  
 28 substance-related disorders/ or exp alcohol-related disorders/ or amphetamine-related disorders/ or cocaine-related disorders/ or exp drug overdose/ or inhalant abuse/ or marijuana abuse/ or exp narcotic-related disorders/ or neonatal abstinence syndrome/ or phencyclidine abuse/ or psychoses, substance-induced/ or substance abuse, intravenous/ or substance abuse, oral/ or exp substance withdrawal syndrome/ [SUD MeSH terms] (279456)  
 Annotation: [SUD MeSH terms minus tobacco use disorder/, per protocol  
 29 ((substance\* or alcohol\* or amphetamine\* or cocaine\* or heroin\* or inhalant\* or marijuana\* or cannabis\* or Phencyclidin\* or PCP or "angel dust") adj2 (abuse\* or addict\* or dependenc\* or disorder\* or habit\* or misuse\* or overdos\* or problem\* or use\* or usage\*)).ti,ab,kw. [SUD Keyword terms] (173815) Annotation: No tobacco/smoking keyword terms, per protocol.  
 30 or/28-29 [SUD set] (363980)  
 31 ("33274509" or "29610676" or "31021945" or "32014521" or "32468826" or "32358615" or "27199563").ui. [exemplars] (7)  
 32 (exp animals/ not humans/) or (animal? or beaver? or beef or bovine or breeding or canine or castoris or cat or cattle or cats or chicken? or cow or dog or dogs or equine or foal or foals or fish or livestock or mice or mouse or pork or porcine or protozoa? or purebred or rat or rats or rodent or rodents or sheep or thoroughbred).ti. or veterinar\$.ti,ab,kw,kf,hw. [animal set] (5305848)  
 33 reproductive health services/ or family planning services/ or maternal health services/ or women's health services/ or preconception care/ or (((contracepti\* or reproducti\* or "family planning" or maternal or pregnan\*) adj2 (care or center\* or centre\* or clinic or clinics or counsel\* or program\* or service\*)) or (women\* adj2 "health service\*")) or (preconception adj2 (care or program\* or service\*))).ti,ab,kw. [Reproductive/contraceptive services MeSH or KW terms] (72941)  
 34 health services/ or exp community health services/ [health sevicess MeSH terms ] (338576)  
 35 "delivery of health care"/ or "delivery of health care, integrated"/ or provider-sponsored organizations/ [delivery of health care MeSH terms] (112173)  
 36 health services accessibility/ or health equity/ or right to health/ or universal health care/ [health services access MeSH terms] (81878)  
 37 (counsel\* or program\* or service\*).ti,ab,kw. (1483244)  
 38 ("health service\*" or ((contracepti\* or community or counseling or dehabituat\* or health or maternal or nursing or rehab\*) adj2 (agency\* or agencies\* or center\* or centre\* or clinic or clinics or program\* or service\*))).ti,ab,kw. [health services KW terms ] (320433)  
 39 (community adj2 ("health service\*" or healthcare or "health care" or nursing)).ti,ab,kw. (13141)  
 40 ((access\* or availabilit\*) adj2 ("health service\*" or healthcare or "health care" or contracept\* or therapy or therapies or treatment\*)).ti,ab,kw. [access KW terms] (31370)  
 41 (access or perception\*).ti,ab. or barrier\*.ti,ab,kw. [barriers set2] (901875)  
 42 or/33-41 [services set] (2551640)  
 43 (and/17,27,42) not 32 [ OUD + female contraception + services final Set] (746)  
 44 or/31,43 [ Final OUD set finds exemplars] (746)  
 45 (and/17,30,42) not (or/32,43) [ SUD + female contraception + services final Set] (1742)  
 46 or/43,45 [ OUD/SUD + female contraception + services Combined Final Set] (2488)  
 47 remove duplicates from 46 (2473)

**Embase (Elsevier) August 2, 2021**

Field tags: de = subject headings |mj = focused subject headings |ti = title |ab = abstract |kw= keyword

#41 #33 AND #40 1748  
 #40 #34 OR #35 OR #36 OR #37 OR #38 OR #39 3077522  
 #39 access:ti,ab OR perception\*:ti,ab OR barrier\*:ti,ab,kw 1167133  
 #38 ((access\* OR availabilit\*) NEAR/2 ('health service\*' OR healthcare OR 'health care' OR contracept\* OR therapy OR therapies OR treatment\*)):ti,ab,kw 43415  
 #37 (community NEAR/2 ('health service\*' OR healthcare OR 'health care' OR nursing)):ti,ab,kw 17512

#36 'health service':ti,ab,kw OR (((contracepti\* OR community OR counseling OR dehabituat\* OR health OR maternal OR nursing OR rehab\*) NEAR/2 (agency\* OR agencies\* OR center\* OR centre\* OR clinic OR clinics OR program\* OR service\*)):ti,ab,kw) 411417

#35 counsel\*:ti,ab,kw OR program\*:ti,ab,kw OR service\*:ti,ab,kw 2010569

#34 'health service'/mj OR 'public health service'/mj OR 'community health nursing'/mj OR 'community psychiatric nursing'/mj OR (((contracepti\* OR reproducti\* OR 'family planning' OR maternal OR pregnan\*) NEAR/2 (care OR center\* OR centre\* OR clinic OR clinics OR counsel\* OR program\* OR service\*)):ti,ab,kw) OR ((women\* NEAR/2 'health service\*'):ti,ab,kw) OR ((preconception NEAR/2 (care OR program\* OR service\*)):ti,ab,kw) 143542

#33 #32 NOT ('conference abstract'/it OR 'conference review'/it) 5400

#32 #30 OR #31 6914

#31 #13 AND #26 NOT (#29 OR #30) 4524

#30 #13 AND #21 NOT #29 2390

#29 #27 OR #28 7835200

#28 animal\*:ti OR beaver\*:ti OR beef:ti OR bovine:ti OR breeding:ti OR canine:ti OR castoris:ti OR cat:ti OR cattle:ti OR cats:ti OR chicken\*:ti OR cow:ti OR dog:ti OR dogs:ti OR equine:ti OR foal:ti OR foals:ti OR fish:ti OR insect\*:ti OR livestock:ti OR mice:ti OR mouse:ti OR murine:ti OR plant:ti OR plants:ti OR pork:ti OR porcine:ti OR protozoa\*:ti OR purebred:ti OR rabbit\*:ti OR rat:ti OR rats:ti OR rodent\*:ti OR sheep:ti OR thoroughbred:ti OR veterinar\*:ti,ab,de 2706467

#27 ('animal'/exp OR 'invertebrate'/exp OR 'animal experiment'/exp OR 'animal model'/exp OR 'animal tissue'/exp OR 'animal cell'/exp OR 'nonhuman'/de) NOT (('animal'/exp OR 'invertebrate'/exp OR 'animal experiment'/exp OR 'animal model'/exp OR 'animal tissue'/exp OR 'animal cell'/exp OR 'nonhuman'/de) AND ('human'/exp OR 'human cell'/de)) 6692113

#26 #22 OR #23 OR #24 OR #25 296841

#25 ((substance\* OR alcohol\* OR amphetamine\* OR cocaine\* OR heroin\* OR inhalant\* OR marijuana\* OR cannabis\* OR phencyclidin\* OR pcp OR 'angel dust') NEAR/2 (abuse\* OR addict\* OR dependenc\* OR disorder\* OR habit\* OR misuse\* OR overdos\* OR problem\* OR use\* OR usage\*)):ti,ab,kw 243335

#24 'drug abuse'/exp/mj 51174

#23 'recreational drug use'/mj OR 'unlicensed drug use'/mj 180

#22 'drug dependence'/mj 33442

#21 #16 OR #17 OR #18 OR #19 OR #20 347866

#20 ('opiate alkaloids':ti,ab OR morphinans:ti,ab OR benzomorphans:ti,ab OR benzomorphan:ti,ab OR pentazocine:ti,ab OR fortral:ti,ab OR lexi:ti,ab OR talwin:ti,ab OR phenazocine:ti,ab OR narphen:ti,ab OR phenbenzorphane:ti,ab OR phenethylazocine:ti,ab OR buprenorphine:ti,ab OR '6029 m':ti,ab OR 6029m:ti,ab OR buprenex:ti,ab OR buprex:ti,ab OR prefin:ti,ab OR 'rx 6029 m':ti,ab OR rx6029m:ti,ab OR temgesic:ti,ab OR suboxone:ti,ab OR butorphanol:ti,ab OR 'apo-butorphanol':ti,ab OR 'bc 2627':ti,ab OR 'bc-2627':ti,ab OR bc2627:ti,ab OR beforal:ti,ab OR dolorex:ti,ab OR moradol:ti,ab OR stadol:ti,ab OR torbugesic:ti,ab OR dextromethorphan:ti,ab OR delysym:ti,ab OR levomethorphan:ti,ab OR racemethorphan:ti,ab OR 'd-methorphan':ti,ab OR 'l-methorphan':ti,ab OR dextrorphan:ti,ab OR methylmorphinan:ti,ab OR diprenorphine:ti,ab OR revivon:ti,ab OR etorphine:ti,ab OR ethorphine:ti,ab OR m66:ti,ab OR levallorphan:ti,ab OR lorfan:ti,ab OR naloxiphan:ti,ab OR levorphanol:ti,ab OR 'l dromoran':ti,ab OR 'l-dromoran':ti,ab OR 'levo dromoran':ti,ab OR 'levo-dromoran':ti,ab OR levodromoran:ti,ab OR levodroman:ti,ab OR levorphan:ti,ab OR 'morphine derivatives':ti,ab OR codeine:ti,ab OR ardinex:ti,ab OR isocodeine:ti,ab OR 'n methylmorphine':ti,ab OR 'n-methylmorphine':ti,ab OR hydrocodone:ti,ab OR codinovo:ti,ab OR dicodid:ti,ab OR dihydrocodeinone:ti,ab OR hycodan:ti,ab OR hycon:ti,ab OR hydrocodeinonebitartrate:ti,ab OR hydrocodon:ti,ab OR oxycodone:ti,ab OR dihydrohydroxycodone:ti,ab OR dihydron:ti,ab OR dinarkon:ti,ab OR eucodal:ti,ab OR oxiconum:ti,ab OR oxycodone:ti,ab OR oxycone:ti,ab OR oxycontin:ti,ab OR pancodine:ti,ab OR theocodin:ti,ab OR dihydromorphine:ti,ab OR paramorfan:ti,ab OR paramorphan:ti,ab OR dionine:ti,ab OR ethomorphine:ti,ab OR ethylmorphine:ti,ab OR heroin:ti,ab OR diacetylmorphine:ti,ab OR diagesil:ti,ab OR diamorf:ti,ab) AND ordiamorphine:ti,ab OR dihydromorphinone:ti,ab OR dilaudid:ti,ab OR hydromorphan:ti,ab OR hydromorphone:ti,ab OR laudacon:ti,ab OR palladone:ti,ab OR morphine:ti,ab OR morphia:ti,ab OR 'ms contin':ti,ab OR duramorph:ti,ab OR oxymorphone:ti,ab OR numorphan:ti,ab OR opana:ti,ab OR thebaine:ti,ab OR nalbuphine:ti,ab OR 'en 2234a':ti,ab OR 'en-2234a':ti,ab OR en2234a:ti,ab OR nubain:ti,ab OR nalorphine:ti,ab OR allylnormorphine:ti,ab OR lethidrone:ti,ab OR naloxone:ti,ab OR nalone:ti,ab OR naloxon:ti,ab OR narkan:ti,ab OR narcanti:ti,ab OR 'mrz 2593':ti,ab OR 'mrz 2593 br':ti,ab OR 'mrz 2593-br':ti,ab OR 'mrz 2593br':ti,ab OR 'mrz-2593':ti,ab OR 'mrz2593':ti,ab OR naltrexone:ti,ab OR antaxone:ti,ab OR celupan:ti,ab OR



'en 1639a':ti,ab OR 'en-1639a':ti,ab OR en1639a:ti,ab OR nalorex:ti,ab OR nemexin:ti,ab OR revia:ti,ab OR trexan:ti,ab OR noscapine:ti,ab OR capval:ti,ab OR 'librochin prikkelhoest':ti,ab OR narcotine:ti,ab OR noscaped:ti,ab OR tuscalman:ti,ab OR papaverine:ti,ab OR cerespan:ti,ab OR pavabid:ti,ab OR pavatym:ti,ab OR pilocarpine:ti,ab OR isopilocarpine:ti,ab OR isoptocarpine:ti,ab OR ocusert:ti,ab OR salagen:ti,ab 116173 #19('6029 m':ti,ab OR 6029m:ti,ab OR acemethadone:ti,ab OR acetylmethadol:ti,ab OR adolonta:ti,ab OR alfenta:ti,ab OR alfentanil:ti,ab OR alfentanyl:ti,ab OR algofan:ti,ab OR alphacetylmethadol:ti,ab OR alphaprodine:ti,ab OR amadol:ti,ab OR amidone:ti,ab OR amidolacetate:ti,ab OR 'apo-butorphanol':ti,ab OR ardinex:ti,ab OR 'bc 2627':ti,ab OR 'bc-2627':ti,ab OR bc2627:ti,ab OR beforal:ti,ab OR 'beta casomorphins':ti,ab OR biodalgic:ti,ab OR biodone:ti,ab OR biokanol:ti,ab OR biopon:ti,ab OR buprenorphine:ti,ab OR buprenex:ti,ab OR buprex:ti,ab OR butorphanol:ti,ab OR carfentanil:ti,ab OR codeine:ti,ab OR codinovo:ti,ab OR cofapon:ti,ab OR contramal:ti,ab OR dago:ti,ab OR dagol:ti,ab OR damge:ti,ab OR damgo:ti,ab OR demerol:ti,ab OR dermorphin:ti,ab OR desomorphine:ti,ab OR dextromoramide:ti,ab OR dextropropoxyphene:ti,ab OR dezocine:ti,ab OR diacetylmorphine:ti,ab OR diagesil:ti,ab OR diamorf:ti,ab OR diamorphine:ti,ab OR dicodid:ti,ab OR dihydrocodeinone:ti,ab OR dihydrocodeine:ti,ab OR dihydrohydroxycodone:ti,ab OR dihydrone:ti,ab OR dihydromorphine:ti,ab OR dihydromorphinone:ti,ab OR dilaudid:ti,ab OR dimepheptanol:ti,ab OR dimethylmeperidine:ti,ab OR dinarkon:ti,ab OR dionine:ti,ab OR diphenoxylate:ti,ab OR dipidolor:ti,ab OR dipydolor:ti,ab OR 'd moramide':ti,ab OR 'd-moramide':ti,ab OR dolantin:ti,ab OR dolargan:ti,ab OR dolcontral:ti,ab OR dolin:ti,ab OR dolophine:ti,ab OR dolorex:ti,ab OR dolosal:ti,ab OR dolsin:ti,ab OR dpdpe:ti,ab OR dplpe:ti,ab OR duragesic:ti,ab OR duramorph:ti,ab OR duorgesic:ti,ab OR 'en 2234a':ti,ab OR 'en-2234a':ti,ab OR en2234a:ti,ab OR endomorphin:ti,ab OR enkephalin:ti,ab OR eseroline:ti,ab OR ethylketazocine:ti,ab OR ethylketocyclazocine:ti,ab OR ethylmorphine:ti,ab OR etorphine:ti,ab OR ethorphine:ti,ab OR eucodal:ti,ab OR fanaxal:ti,ab OR fenoperidine:ti,ab OR fentanest:ti,ab OR fentanyl:ti,ab OR fentora:ti,ab OR fortral:ti,ab OR 'go 1261':ti,ab OR 'go-1261':ti,ab OR go1261:ti,ab OR heroin:ti,ab OR hycodan:ti,ab OR hycon:ti,ab OR hydrocodeinonebitartrate:ti,ab OR hydrocodon:ti,ab OR hydrocodone:ti,ab OR hydromorphon:ti,ab OR hydromorphone:ti,ab) AND isocodeine:ti,ab OR isonipecaïn:ti,ab OR isopromedol:ti,ab OR jutadol:ti,ab OR 'k 315':ti,ab OR 'k-315':ti,ab OR k315:ti,ab OR ketobemidone:ti,ab OR laam:ti,ab OR laudacon:ti,ab OR laudanon:ti,ab OR laudanum:ti,ab OR 'l dromoran':ti,ab OR 'l-dromoran':ti,ab OR lealgin:ti,ab OR levoacetylmethadol:ti,ab OR levomethadyl:ti,ab OR 'levo dromoran':ti,ab OR 'levo-dromoran':ti,ab OR levodromoran:ti,ab OR levodroman:ti,ab OR levorphan:ti,ab OR levorphanol:ti,ab OR lexir:ti,ab OR lidol:ti,ab OR limifen:ti,ab OR lofentanil:ti,ab OR lydol:ti,ab OR m99:ti,ab OR meperidine:ti,ab OR meptazinol:ti,ab OR meptid:ti,ab OR metadol:ti,ab OR metasedin:ti,ab OR methaddict:ti,ab OR methadol:ti,ab OR methadyl:ti,ab OR 'methadyl acetate':ti,ab OR methylmorphinan:ti,ab OR methadone:ti,ab OR methadose:ti,ab OR methex:ti,ab OR moradol:ti,ab OR morphine:ti,ab OR morphines:ti,ab OR morphia:ti,ab OR 'ms contin':ti,ab OR 'mtw tramadol':ti,ab OR 'mtw-tramadol':ti,ab OR 'mtwtramadol':ti,ab OR nalbuphine:ti,ab OR narcotic\*:ti,ab OR narphen:ti,ab OR nepenthe:ti,ab OR nisentil:ti,ab OR 'n methylmorphine':ti,ab OR 'n-methylmorphine':ti,ab OR nobligan:ti,ab OR nocistatin:ti,ab OR normethadone:ti,ab OR nubain:ti,ab OR numorphan:ti,ab OR omnopon:ti,ab OR opana:ti,ab OR opial:ti,ab OR opioid\*:ti,ab OR opiod\*:ti,ab OR opiate\*:ti,ab OR opium\*:ti,ab OR operidine:ti,ab OR opon:ti,ab OR oposal:ti,ab OR orlaam:ti,ab OR oxiconum:ti,ab OR oxycodone:ti,ab OR oxycodone:ti,ab OR oxymorphone:ti,ab OR oxycone:ti,ab OR oxycontin:ti,ab OR palfium:ti,ab OR palladone:ti,ab OR pancodine:ti,ab OR papaveretum:ti,ab OR pantopon\*:ti,ab OR paramorfan:ti,ab OR paramorphan:ti,ab OR pavon:ti,ab OR pentazocine:ti,ab OR pethidine:ti,ab OR phenadone:ti,ab OR phenazocine:ti,ab OR phenbenzorphin:ti,ab OR phenethylazocine:ti,ab OR phenoperidine:ti,ab OR phentanyl:ti,ab OR phymet:ti,ab OR physeptone:ti,ab OR pinadone:ti,ab OR pirinitramide:ti,ab OR piritramid:ti,ab OR piritramide:ti,ab OR prefin:ti,ab OR prodine:ti,ab OR propoxyphene:ti,ab OR promedol:ti,ab OR prontofort:ti,ab OR protopine:ti,ab OR pyrrolamidol:ti,ab OR 'r 1406':ti,ab OR 'r-1406':ti,ab OR r1406:ti,ab OR 'r 30730':ti,ab OR 'r-30730':ti,ab OR r30730:ti,ab OR 'r 39209':ti,ab OR 'r-39209':ti,ab OR r39209:ti,ab OR 'r 4263':ti,ab OR 'r-4263':ti,ab OR r2463:ti,ab OR 'ranitidin 1a pharma':ti,ab OR rapifen:ti,ab OR remifentanil:ti,ab OR 'rx 6029 m':ti,ab OR rx6029m:ti,ab OR 'rx 783006':ti,ab OR 'rx-783006':ti,ab OR stadol:ti,ab OR sublimaze:ti,ab OR suboxone:ti,ab OR sufenta:ti,ab OR sufentanil:ti,ab OR sufentanilhameln:ti,ab OR sufentanilratiopharm:ti,ab OR sulfentanil:ti,ab OR sulfentanyl:ti,ab OR symoron:ti,ab OR talwin:ti,ab OR takadol:ti,ab OR temgesic:ti,ab OR tetrapon:ti,ab OR theocodin:ti,ab OR theradol:ti,ab OR tilidate:ti,ab OR tilidin:ti,ab OR tilidine:ti,ab OR tiral:ti,ab OR topalgic:ti,ab OR torbugesic:ti,ab OR tradol:ti,ab OR tradolpuren:ti,ab OR tradonal:ti,ab OR tralgiol:ti,ab OR 'trama 1a pharma':ti,ab OR 'trama abz':ti,ab OR 'trama dorsch':ti,ab OR 'trama kd':ti,ab OR 'trama-dorsch':ti,ab OR tramadorsch:ti,ab OR tramabeta:ti,ab OR tramadin:ti,ab OR tramadoc:ti,ab OR tramadol:ti,ab OR tramadoldolgit:ti,ab OR tramadolhameln:ti,ab OR tramador:ti,ab OR tramadolratiopharm:ti,ab OR tramadura:ti,ab OR tramagetic:ti,ab OR tramagit:ti,ab OR tramake:ti,ab OR tramal:ti,ab OR tramex:ti,ab OR tramundin:ti,ab OR trasedal:ti,ab OR trimeperidine:ti,ab OR

ultram:ti,ab OR valerone:ti,ab OR 'win 35197 2':ti,ab OR 'win-35197-2':ti,ab OR win351972:ti,ab OR 'wy 22811':ti,ab OR 'wy-22811':ti,ab OR wy22811:ti,ab OR 'xymel 50':ti,ab OR zamudol:ti,ab OR zumalgic:ti,ab OR zydol:ti,ab OR zytram:ti,ab OR opioid\*:kw,tn OR opium:kw,tn OR heroin:kw,tn OR morphine:kw,tn 254686 #18('6029 m':ti,ab OR 6029m:ti,ab OR acemethadone:ti,ab OR acetylmethadol:ti,ab OR adolonta:ti,ab OR alfenta:ti,ab OR alfentanil:ti,ab OR alfentanyl:ti,ab OR algozan:ti,ab OR alphacetylmethadol:ti,ab OR alphaprodine:ti,ab OR amadol:ti,ab OR amidone:ti,ab OR amidolacetate:ti,ab OR 'apo-butorphanol':ti,ab OR ardinex:ti,ab OR 'bc 2627':ti,ab OR 'bc-2627':ti,ab OR bc2627:ti,ab OR beforal:ti,ab OR 'beta casomorphins':ti,ab OR biodalgic:ti,ab OR biodone:ti,ab OR biokanol:ti,ab OR biopon:ti,ab OR buprenorphine:ti,ab OR buprenex:ti,ab OR buprex:ti,ab OR butorphanol:ti,ab OR carfentanil:ti,ab OR codeine:ti,ab OR codinovo:ti,ab OR cofapon:ti,ab OR contramal:ti,ab OR dago:ti,ab OR dagol:ti,ab OR damge:ti,ab OR damgo:ti,ab OR demerol:ti,ab OR dermorphin:ti,ab OR desomorphine:ti,ab OR dextromoramide:ti,ab OR dextropropoxyphene:ti,ab OR dezocine:ti,ab OR diacetylmorphine:ti,ab OR diagesil:ti,ab OR diamorf:ti,ab OR diamorphine:ti,ab OR dicodid:ti,ab OR dihydrocodeinone:ti,ab OR dihydrocodeine:ti,ab OR dihydrohydroxycodone:ti,ab OR dihydrone:ti,ab OR dihydromorphine:ti,ab OR dihydromorphinone:ti,ab OR dilaudid:ti,ab OR dimepheptanol:ti,ab OR dimethylmeperidine:ti,ab OR dinarkon:ti,ab OR dionine:ti,ab OR diphenoxylate:ti,ab OR dipidolor:ti,ab OR dipydolor:ti,ab OR 'd moramide':ti,ab OR 'd-moramide':ti,ab OR dolantin:ti,ab OR dolargan:ti,ab OR dolcontral:ti,ab OR dolin:ti,ab OR dolophine:ti,ab OR dolorex:ti,ab OR dolosal:ti,ab OR dolsin:ti,ab OR dpdpe:ti,ab OR dplpe:ti,ab OR duragesic:ti,ab OR duramorph:ti,ab OR durogesic:ti,ab OR 'en 2234a':ti,ab OR 'en-2234a':ti,ab OR en2234a:ti,ab OR endomorphin:ti,ab OR enkephalin:ti,ab OR eseroline:ti,ab OR ethylketazocine:ti,ab OR ethylketocyclazocine:ti,ab OR ethylmorphine:ti,ab OR etorphine:ti,ab OR ethorphine:ti,ab OR eucodal:ti,ab OR fanaxal:ti,ab OR fenoperidine:ti,ab OR fentanest:ti,ab OR fentanyl:ti,ab OR fentora:ti,ab OR fortral:ti,ab OR 'go 1261':ti,ab OR 'go-1261':ti,ab OR go1261:ti,ab OR heroin:ti,ab OR hycodan:ti,ab OR hycon:ti,ab OR hydrocodeinonebitartrate:ti,ab OR hydrocodon:ti,ab OR hydrocodone:ti,ab OR hydromorphon:ti,ab OR hydromorphone:ti,ab) AND isocodeine:ti,ab OR isonipicain:ti,ab OR isopromedol:ti,ab OR jutadol:ti,ab OR 'k 315':ti,ab OR 'k-315':ti,ab OR k315:ti,ab OR ketobemidone:ti,ab OR laam:ti,ab OR laudacon:ti,ab OR laudanon:ti,ab OR laudanum:ti,ab OR 'l dromoran':ti,ab OR 'l-dromoran':ti,ab OR lealgin:ti,ab OR levoacetylmethadol:ti,ab OR levomethadyl:ti,ab OR 'levo dromoran':ti,ab OR 'levo-dromoran':ti,ab OR levodromoran:ti,ab OR levodroman:ti,ab OR levorphan:ti,ab OR levorphanol:ti,ab OR lexic:ti,ab OR lidol:ti,ab OR limifen:ti,ab OR lofentanil:ti,ab OR lydol:ti,ab OR m99:ti,ab OR meperidine:ti,ab OR meptazinol:ti,ab OR meptid:ti,ab OR metadol:ti,ab OR metasedin:ti,ab OR methaddict:ti,ab OR methadol:ti,ab OR methadyl:ti,ab OR 'methadyl acetate':ti,ab OR methylmorphinan:ti,ab OR methadone:ti,ab OR methadose:ti,ab OR methex:ti,ab OR moradol:ti,ab OR morphine:ti,ab OR morphines:ti,ab OR morphia:ti,ab OR 'ms contin':ti,ab OR 'mtw tramadol':ti,ab OR 'mtw-tramadol':ti,ab OR 'mtwtramadol':ti,ab OR nalbuphine:ti,ab OR narcotic\*:ti,ab OR narphen:ti,ab OR nepenthe:ti,ab OR nisentil:ti,ab OR 'n methylmorphine':ti,ab OR 'n-methylmorphine':ti,ab OR nobligan:ti,ab OR nocistatin:ti,ab OR normethadone:ti,ab OR nubain:ti,ab OR numorphan:ti,ab OR omnopon:ti,ab OR opana:ti,ab OR opial:ti,ab OR opioid\*:ti,ab OR opioid\*:ti,ab OR opiate\*:ti,ab OR opium\*:ti,ab OR operidine:ti,ab OR opan:ti,ab OR oposal:ti,ab OR orlaam:ti,ab OR oxiconum:ti,ab OR oxycodone:ti,ab OR oxycodone:ti,ab OR oxymorphone:ti,ab OR oxycone:ti,ab OR oxycontin:ti,ab OR palfium:ti,ab OR palladone:ti,ab OR pancodine:ti,ab OR papaveretum:ti,ab OR pantopon\*:ti,ab OR paramorfan:ti,ab OR paramorphan:ti,ab OR pavon:ti,ab OR pentazocine:ti,ab OR pethidine:ti,ab OR phenadone:ti,ab OR phenazocine:ti,ab OR phenbenzorphin:ti,ab OR phenethylazocine:ti,ab OR phenoperidine:ti,ab OR phentanyl:ti,ab OR phymet:ti,ab OR physeptone:ti,ab OR pinadone:ti,ab OR pirinitramide:ti,ab OR piritramid:ti,ab OR piritramide:ti,ab OR prefin:ti,ab OR prodine:ti,ab OR propoxyphene:ti,ab OR promedol:ti,ab OR prontofort:ti,ab OR protopine:ti,ab OR pyrrolamidol:ti,ab OR 'r 1406':ti,ab OR 'r-1406':ti,ab OR r1406:ti,ab OR 'r 30730':ti,ab OR 'r-30730':ti,ab OR r30730:ti,ab OR 'r 39209':ti,ab OR 'r-39209':ti,ab OR r39209:ti,ab OR 'r 4263':ti,ab OR 'r-4263':ti,ab OR r2463:ti,ab OR 'ranitidin 1a pharma':ti,ab OR rapifen:ti,ab OR remifentanil:ti,ab OR 'rx 6029 m':ti,ab OR rx6029m:ti,ab OR 'rx 783006':ti,ab OR 'rx-783006':ti,ab OR stadol:ti,ab OR sublimaze:ti,ab OR suboxone:ti,ab OR sufenta:ti,ab OR sufentanil:ti,ab OR sufentanilhameln:ti,ab OR sufentanilratiopharm:ti,ab OR sulfentanil:ti,ab OR sulfentanyl:ti,ab OR symoron:ti,ab OR talwin:ti,ab OR takadol:ti,ab OR temgesic:ti,ab OR tetrapon:ti,ab OR theocodin:ti,ab OR theradol:ti,ab OR tilidate:ti,ab OR tilidin:ti,ab OR tilidine:ti,ab OR tiral:ti,ab OR topalgic:ti,ab OR torbugesic:ti,ab OR tradol:ti,ab OR tradolpuren:ti,ab OR tradonal:ti,ab OR tralgol:ti,ab OR 'trama 1a pharma':ti,ab OR 'trama abz':ti,ab OR 'trama dorsch':ti,ab OR 'trama kd':ti,ab OR 'trama-dorsch':ti,ab OR tramadorsch:ti,ab OR tramabeta:ti,ab OR tramadin:ti,ab OR tramadoc:ti,ab OR tramadol:ti,ab OR tramadoldolgit:ti,ab OR tramadolhameln:ti,ab OR tramadolor:ti,ab OR tramadolratiopharm:ti,ab OR tramadura:ti,ab OR tramagetic:ti,ab OR tramagit:ti,ab OR tramake:ti,ab OR tramal:ti,ab OR tramex:ti,ab OR tramundin:ti,ab OR trasedal:ti,ab OR trimeperidine:ti,ab OR ultram:ti,ab OR valerone:ti,ab OR 'win 35197 2':ti,ab OR 'win-35197-2':ti,ab OR win351972:ti,ab OR 'wy

22811':ti,ab OR 'wy-22811':ti,ab OR wy22811:ti,ab OR 'xymel 50':ti,ab OR zamudol:ti,ab OR zumalgic:ti,ab OR zydol:ti,ab OR zytram:ti,ab 249788

#17 'opiate'/mj OR 'narcotic analgesic agent'/exp/mj 163967

#16 #14 OR #15 84796

#15 ((opioid\* OR opiate\* OR heroin OR morphine\* OR narcotic\* OR opium\*) NEAR/2 (abuse\* OR addict\* OR dependenc\* OR disorder\* OR habit\* OR misuse\* OR overdos\* OR problem\* OR use\* OR usage\*)):ti,ab,kw 62431

#14 'drug induced disease'/mj OR 'opiate addiction'/mj OR 'narcotic dependence'/mj OR 'heroin dependence'/mj OR 'morphine addiction'/mj 35902

#13 #7 OR ((#1 OR #2 OR #8 OR #9 OR #10) AND #11) OR ((#1 OR #2 OR #8 OR #9 OR #10) NOT #12) 362703

#12 'male'/exp NOT ('male'/exp AND 'female'/exp) 3115724

#11 'female'/de OR 'female by marital status'/exp OR 'female by occupation'/exp OR 'female by sexual orientation'/exp OR 'girl'/exp OR 'named groups by pregnancy'/exp OR female\*:ti,ab,kw OR woman\*:ti,ab,kw OR women\*:ti,ab,kw OR maternal\*:ti,ab,kw OR mother\*:ti,ab,kw OR girl\*:ti,ab,kw OR pregnan\*:ti,ab,kw 11054826

#10 'reproductive behavior'/mj OR 'contraceptive behavior'/exp/mj OR (((contracepti\* OR reproduct) NEAR/2 (behavior\* OR behaviour\* OR complian\* OR method\* OR usage\* OR 'use'))):ti,ab,kw 29378

#9 antifertility:ti,ab,kw OR 'antispermatogenic agent\*':ti,ab,kw OR 'coitus interruptus':ti,ab,kw OR condom\*:ti,ab,kw OR contraceptive\*:ti,ab,kw OR contraception\*:ti,ab,kw OR 'cyproterone acetate':ti,ab,kw OR dienogest:ti,ab,kw OR gossypol:ti,ab,kw OR lonidamine:ti,ab,kw OR medroxyprogesterone:ti,ab,kw OR molinate:ti,ab,kw OR 'p-coumaric acid':ti,ab,kw OR triptolide:ti,ab,kw OR 'intravasal thread':ti,ab,kw OR 'reproductive right\*':ti,ab,kw 128282

#8 'birth control'/mj OR 'contraception'/exp/mj OR 'family planning'/mj OR 'induced abortion'/exp/mj OR 'involuntary fertility control'/exp/mj 101699

#7 #3 OR #4 OR #5 OR #6 297440

#6 anticonception:ti,ab,kw OR antiovlut\*:ti,ab,kw OR (((birth OR fertility OR population) NEAR/1 control):ti,ab,kw) OR 'family planning':ti,ab,kw OR immunocontracepti\*:ti,ab,kw OR (((block\* OR inhibit\* OR prevent\*) NEAR/1 (fertilization OR fertilisation)):ti,ab,kw) OR larcs:ti,ab,kw OR 'long acting reversible contracepti\*':ti,ab,kw OR 'reversible long-acting contracepti\*':ti,ab,kw OR ((ovulation NEAR/1 (block\* OR inhibit\* OR suppression)):ti,ab,kw) OR (((female OR reproductive) NEAR/2 sterilization):ti,ab,kw) OR 'intrauterine device\*':ti,ab,kw OR (((contraceptive OR copper\* OR hormon\* OR unmedicated) NEAR/1 (iud OR iuds)):ti,ab,kw) 52310

#5 '4 diisobutylphenoxypolyethoxyethanol':ti,ab,kw OR aborti\*:ti,ab,kw OR algestone:ti,ab,kw OR alpagelle:ti,ab,kw OR anordiol:ti,ab,kw OR anordrin:ti,ab,kw OR anticonceptive:ti,ab,kw OR antifertility:ti,ab,kw OR 'anti fertility':ti,ab,kw OR 'benzethonium chloride plus nonoxinol 9':ti,ab,kw OR 'birth control':ti,ab,kw OR 'bisecurin i':ti,ab,kw OR 'camphor plus eucalyptus oil plus gum benzoin plus menthol plus polidocanol':ti,ab,kw OR 'carbopol 974p':ti,ab,kw OR 'cellulose sulfate':ti,ab,kw OR centchroman:ti,ab,kw OR 'cervical cap\*':ti,ab,kw OR chlormadinone:ti,ab,kw OR 'chorionic gonadotropin vaccine\*':ti,ab,kw OR 'citric acid plus lactic acid plus potassium bitartrate':ti,ab,kw OR cloprostenol:ti,ab,kw OR 'coiled spring\*':ti,ab,kw OR 'coitus interruptus':ti,ab,kw OR 'conjugated estrogen\*':ti,ab,kw OR contraception\*:ti,ab,kw OR contraceptiv\*:ti,ab,kw OR cycloprovera:ti,ab,kw OR cyklabil:ti,ab,kw OR depositions:ti,ab,kw OR desogestrel:ti,ab,kw OR 'diallyl disulfide':ti,ab,kw OR 'diallyl trisulfide':ti,ab,kw OR diethylstilbestrol:ti,ab,kw OR dimethisterone:ti,ab,kw OR 'drospirenone plus ethinylestradiol':ti,ab,kw OR embryotom\*:ti,ab,kw OR emmenagogue\*:ti,ab,kw OR 'estradiol enanthate':ti,ab,kw OR 'estradiol plus nomegestrol acetate':ti,ab,kw OR 'estradiol valerate plus norethisterone enantate':ti,ab,kw OR estropipate:ti,ab,kw OR 'ethinyl estradiol':ti,ab,kw OR 'ethynodiol diacetate':ti,ab,kw OR ethinylestradiol:ti,ab,kw OR etonogestrel:ti,ab,kw OR 'etynodiol diacetate plus mestranol':ti,ab,kw OR 'female sterilization\*':ti,ab,kw OR 'female sterilisation\*':ti,ab,kw OR femovan:ti,ab,kw OR fluprostenol:ti,ab,kw OR gestodene:ti,ab,kw OR gestrinone:ti,ab,kw OR immunocontracepti\*:ti,ab,kw OR infecundin:ti,ab,kw OR 'intrauterine device\*':ti,ab,kw OR 'iud':ti,ab,kw OR 'iuds':ti,ab,kw OR kentsin:ti,ab,kw OR korlym:ti,ab,kw OR 'levonorgestrel':ti,ab,kw OR lonidamine:ti,ab,kw OR 'luteolytic agent\*':ti,ab,kw OR 'lynestrenol':ti,ab,kw OR megestrol:ti,ab,kw OR 'menfegol':ti,ab,kw OR 'menstruation inducing agent\*':ti,ab,kw OR 'menstruation-inducing agent\*':ti,ab,kw OR mestranol:ti,ab,kw OR mifegyne:ti,ab,kw OR mifeprex:ti,ab,kw OR mifepristone:ti,ab,kw OR 'morning after pill':ti,ab,kw OR 'neem oil':ti,ab,kw OR 'non ovlon':ti,ab,kw OR 'nonidet p-40':ti,ab,kw OR nonoxynol:ti,ab,kw OR noracycline:ti,ab,kw OR norelgestromin:ti,ab,kw OR norethisterone:ti,ab,kw OR norethynodrel:ti,ab,kw OR norgestimate:ti,ab,kw OR norgestrienoneor:ti,ab,kw OR nuvaring:ti,ab,kw OR octoxinol:ti,ab,kw OR octoxynol:ti,ab,kw OR ormeloxifene:ti,ab,kw OR 'ortho evra':ti,ab,kw OR 'ortho 777':ti,ab,kw OR oviol:ti,ab,kw OR

'ovulation inhibition':ti,ab,kw OR plumbagin:ti,ab,kw OR paraformaldehyde:ti,ab,kw OR polidocanol:ti,ab,kw OR 'postcoit\* pill':ti,ab,kw OR 'progestin implant\*':ti,ab,kw OR 'ring pessar\*':ti,ab,kw OR 'sc-11800 ee':ti,ab,kw OR segesterone:ti,ab,kw OR 'shelf pessar\*':ti,ab,kw OR 'sperm immobilizing agent\*':ti,ab,kw OR 'st 1435':ti,ab,kw OR sulprostone:ti,ab,kw OR tanaproget:ti,ab,kw OR trestolone:ti,ab,kw OR 'triptorelin pamoate':ti,ab,kw OR trisequens:ti,ab,kw OR tristep:ti,ab,kw OR 'triton x 100':ti,ab,kw OR 'tubal occlusion':ti,ab,kw OR ulipristal:ti,ab,kw OR yuehchukene:ti,ab,kw OR (((spermicidal OR spermatocidal) NEAR/3 agent\*):ti,ab,kw) OR ((vagina\* NEAR/3 (diaphragm\* OR ring\* OR shield\* OR sponge\* OR pessar\*)):ti,ab,kw) OR ((prevent\* NEAR/3 pregnan\*):ti,ab,kw) OR alesse:ti,ab,kw OR apri:ti,ab,kw OR aranelle:ti,ab,kw OR aviane:ti,ab,kw OR azurette:ti,ab,kw OR balziva:ti,ab,kw OR beyaz:ti,ab,kw OR brevicon:ti,ab,kw OR camrese:ti,ab,kw OR cesia:ti,ab,kw OR cryselle:ti,ab,kw OR cyclessa:ti,ab,kw OR demulen:ti,ab,kw OR desogen:ti,ab,kw OR enpresse:ti,ab,kw OR estrostep:ti,ab,kw OR femcon:ti,ab,kw OR gianvi:ti,ab,kw OR jolessa:ti,ab,kw OR junel:ti,ab,kw OR kariva:ti,ab,kw OR kelnor:ti,ab,kw OR leena:ti,ab,kw OR lessina:ti,ab,kw OR levlen:ti,ab,kw OR levlite:ti,ab,kw OR levora:ti,ab,kw OR 'lo/ovral':ti,ab,kw OR loestrin:ti,ab,kw OR loryna:ti,ab,kw OR loseasonique:ti,ab,kw OR 'low ogestrel':ti,ab,kw OR lutera:ti,ab,kw OR lybrel:ti,ab,kw OR microgestin:ti,ab,kw OR 'min ovral':ti,ab,kw OR mircette:ti,ab,kw OR modicon:ti,ab,kw OR mononessa:ti,ab,kw OR natazia:ti,ab,kw OR necon:ti,ab,kw OR nordette:ti,ab,kw OR norinyl:ti,ab,kw OR nortrel:ti,ab,kw OR ocella:ti,ab,kw OR ogestrel:ti,ab,kw OR 'ortho tri-cyclen':ti,ab,kw OR 'ortho-cept':ti,ab,kw OR 'ortho-cyclen':ti,ab,kw OR 'ortho-novum':ti,ab,kw OR 'ovcon':ti,ab,kw OR 'portia':ti,ab,kw OR 'previfem':ti,ab,kw OR quasense:ti,ab,kw OR reclipen:ti,ab,kw OR safyral:ti,ab,kw OR seasonale:ti,ab,kw OR seasonique:ti,ab,kw OR solia:ti,ab,kw OR sprintec:ti,ab,kw OR sronyx:ti,ab,kw OR syeda:ti,ab,kw OR tilia:ti,ab,kw OR 'tri-legest':ti,ab,kw OR 'trinessa':ti,ab,kw OR 'tri norinyl':ti,ab,kw OR triphasil:ti,ab,kw OR 'tri previfem':ti,ab,kw OR triquilar:ti,ab,kw OR 'tri sprintec':ti,ab,kw OR trivora:ti,ab,kw OR velivet:ti,ab,kw OR yasmin:ti,ab,kw OR yaz:ti,ab,kw OR zarah:ti,ab,kw OR zenchent:ti,ab,kw OR zeosa:ti,ab,kw OR zovia:ti,ab,kw OR camila:ti,ab,kw OR errin:ti,ab,kw OR heather:ti,ab,kw OR jolivette:ti,ab,kw OR micronor:ti,ab,kw OR 'nor-q.d.':ti,ab,kw OR ovrette:ti,ab,kw OR 'birth-control':ti,ab,kw OR minipill:ti,ab,kw OR norethindrone:ti,ab,kw OR norgestrel:ti,ab,kw 244143

- #4 'hormonal contraceptive agent'/exp/mj OR 'injectable contraceptive agent'/exp/mj OR 'luteolytic agent'/mj OR 'menstruation inducing agent'/mj OR 'oral contraceptive agent'/exp/mj OR 'postcoitus contraceptive agent'/exp/mj OR 'spermicidal agent'/exp/mj 65155  
 #3 'female contraceptive device'/exp/mj 14871  
 #2 'contraceptive device'/mj 675  
 #1 'contraceptive agent'/mj 9282

**CINAHL Complete (Ebscohost)**

August 2, 2021

Field tags: MH = MeSH heading | TI = Title | AB = Abstract

|     |                                                                                                                                                                                                                                                                                                                                                                                                                                                                                                                                            |           |
|-----|--------------------------------------------------------------------------------------------------------------------------------------------------------------------------------------------------------------------------------------------------------------------------------------------------------------------------------------------------------------------------------------------------------------------------------------------------------------------------------------------------------------------------------------------|-----------|
| S38 | S34 AND S37                                                                                                                                                                                                                                                                                                                                                                                                                                                                                                                                | 1,357     |
| S37 | S35 OR S36                                                                                                                                                                                                                                                                                                                                                                                                                                                                                                                                 | 3,018     |
| S36 | (S14 AND S24) NOT S27                                                                                                                                                                                                                                                                                                                                                                                                                                                                                                                      | 2,689     |
| S35 | (S14 AND S21) NOT S27                                                                                                                                                                                                                                                                                                                                                                                                                                                                                                                      | 610       |
| S34 | (S28 OR S29 OR S30 OR S31 OR S32 OR S33)                                                                                                                                                                                                                                                                                                                                                                                                                                                                                                   | 1,259,897 |
| S33 | TI ( access or perception* or barrier* ) OR AB ( access or perception* or barrier* )                                                                                                                                                                                                                                                                                                                                                                                                                                                       | 330,347   |
| S32 | TI ( ((access* or availabilit*) N2 ("health service*" or healthcare or "health care" or contracept* or therapy or therapies or treatment*)) ) OR AB ( ((access* or availabilit*) N2 ("health service*" or healthcare or "health care" or contracept* or therapy or therapies or treatment*)) )                                                                                                                                                                                                                                             | 25,693    |
| S31 | TI ( (counsel* or program* or service*) ) OR AB ( (counsel* or program* or service*) )                                                                                                                                                                                                                                                                                                                                                                                                                                                     | 708,812   |
| S30 | TI ( (community N2 ("health service*" or healthcare or "health care" or nursing)) ) OR AB ( (community N2 ("health service*" or healthcare or "health care" or nursing)) )                                                                                                                                                                                                                                                                                                                                                                 | 15,220    |
| S29 | TI ( (((contracepti* or reproducti* or "family planning" or maternal or pregnan*) N2 (care or center* or centre* or clinic or clinics or counsel* or program* or service*)) or (women* N2 "health service*") or (preconception N2 (care or program* or service*)) ) OR AB ( (((contracepti* or reproducti* or "family planning" or maternal or pregnan*) N2 (care or center* or centre* or clinic or clinics or counsel* or program* or service*)) or (women* N2 "health service*") or (preconception N2 (care or program* or service*)) ) | 20,153    |
| S28 | (MH "Health Services") OR (MH "Community Health Services+") OR (MH "Family Planning")                                                                                                                                                                                                                                                                                                                                                                                                                                                      | 473,111   |
| S27 | S25 OR S26                                                                                                                                                                                                                                                                                                                                                                                                                                                                                                                                 | 180,599   |

S26 TI ( (animal\* or beaver\* or beef or bovine or breeding or canine or castoris or cat or cattle or cats or chicken? or cow or dog or dogs or equine or foal or foals or fish or livestock or mice or mouse or pork or porcine or purebred or rat or rats or rodent or rodents or sheep or thoroughbred) ) OR TI veterinar\* OR AB veterinar\*  
111,793

S25 (MH "Animals+") NOT (MH "Human") 89,005

S24 S22 OR S23 153,779

S23 TI ( ((substance\* or alcohol\* or amphetamine\* or cocaine\* or heroin\* or inhalant\* or marijuana\* or cannabis\* or Phencyclidin\* or PCP or "angel dust") N2 (abuse\* or addict\* or dependenc\* or disorder\* or habit\* or misuse\* or overdos\* or problem\* or use\* or usage\*)) ) OR AB ( ((substance\* or alcohol\* or amphetamine\* or cocaine\* or heroin\* or inhalant\* or marijuana\* or cannabis\* or Phencyclidin\* or PCP or "angel dust") N2 (abuse\* or addict\* or dependenc\* or disorder\* or habit\* or misuse\* or overdos\* or problem\* or use\* or usage\*)) )  
86,992

S22 (MH "Substance Use Disorders") OR (MH "Substance Abuse+") OR (MH "Substance Dependence") OR (MH "Alcohol-Related Disorders+") OR (MH "Binge Drinking") 117,438

S21 S15 OR S16 OR S17 OR S18 OR S19 OR S20 80,858

S20 TI ( ("Opiate Alkaloids" or Morphinans or Benzomorphans or Benzomorphan or Pentazocine or fortal or lexis or talwin or Phenazocine or narphen or phenbenzorphane or phenethylazocine or Buprenorphine or "6029 m" or 6029m or buprenex or buprex or prefin or "rx 6029 m" or rx6029m or temgesic or suboxone or Butorphanol or "apo-butorphanol" or "bc 2627" or "bc-2627" or bc2627 or beforal or dolorex or moradol or stadol or torbugesic or Dextromethorphan or delysym or levomethorphan or racemethorphan or "d-methorphan" or "l-methorphan" or Dextrorphan or methylmorphinan or Diprenorphine or revivon or Etorphine or ethorphine or m66 or Levallorphan or lorfane or naloxiphan or Levorphanol or "l dromoran" or "l-dromoran" or "levo dromoran" or "levo-dromoran" or levodromoran or levodroman or levorphan or "Morphine Derivatives" or Codeine or ardinex or isocodeine or "n methylmorphine" or "n-methylmorphine" or Hydrocodone or codinovo or dicodid or dihydrocodeinone or hycodan or hycon or hydrocodeinonebitartrate or hydrocodon or Oxycodone or dihydrohydroxycodone or dihydron or dinarkon or eucodal or oxiconum or oxycodone or oxycone or oxycontin or pancodine or theocodin or Dihydromorphine or paramorfan or paramorphan or Ethylmorphine or dionine or ethomorphine or ethylmorphine or Heroin or diacetylmorphine or diagesil or diamorf ordiamorphine or Hydromorphone or dihydromorphinone or dilaudid or hydromorphan or hydromorphone or laudacon or palladone or Morphine or morphia or "ms contin" or duramorph or Oxymorphone or numorphan or opana or Thebaine or Nalbuphine or "en 2234a" or "en-2234a" or en2234a or nubain or Nalorphine or allylnormorphine or lethidrone or Naloxone or Nalone or Naloxon or Narcan or Narcanti or "mrz 2593" or "mrz 2593 br" or "mrz 2593-br" or "mrz 2593br" or "mrz-2593" or "mrz2593" or Naltrexone or antaxone or celupan or "en 1639a" or "en-1639a" or en1639a or nalorex or nemexin or revia or trexan or Noscapine or capval or "librochin prikkelhoest" or narcotine or noscapect or tuscalman or Papaverine or cerespan or pavabid or pavatym or pilocarpine or isopilocarpine or isoptocarpine or ocusert or salagen) ) OR AB ( ("Opiate Alkaloids" or Morphinans or Benzomorphans or Benzomorphan or Pentazocine or fortal or lexis or talwin or Phenazocine or narphen or phenbenzorphane or phenethylazocine or Buprenorphine or "6029 m" or 6029m or buprenex or buprex or prefin or "rx 6029 m" or rx6029m or temgesic or suboxone or Butorphanol or "apo-butorphanol" or "bc 2627" or "bc-2627" or bc2627 or beforal or dolorex or moradol or stadol or torbugesic or Dextromethorphan or delysym or levomethorphan or racemethorphan or "d-methorphan" or "l-methorphan" or Dextrorphan or methylmorphinan or Diprenorphine or revivon or Etorphine or ethorphine or m66 or Levallorphan or lorfane or naloxiphan or Levorphanol or "l dromoran" or "l-dromoran" or "levo dromoran" or "levo-dromoran" or levodromoran or levodroman or levorphan or "Morphine Derivatives" or Codeine or ardinex or isocodeine or "n methylmorphine" or "n-methylmorphine" or Hydrocodone or codinovo or dicodid or dihydrocodeinone or hycodan or hycon or hydrocodeinonebitartrate or hydrocodon or Oxycodone or dihydrohydroxycodone or dihydron or dinarkon or eucodal or oxiconum or oxycodone or oxycone or oxycontin or pancodine or theocodin or Dihydromorphine or paramorfan or paramorphan or Ethylmorphine or dionine or ethomorphine or ethylmorphine or Heroin or diacetylmorphine or diagesil or diamorf ordiamorphine or Hydromorphone or dihydromorphinone or dilaudid or hydromorphan or hydromorphone or laudacon or palladone or Morphine or morphia or "ms contin" or duramorph or Oxymorphone or numorphan or opana or Thebaine or Nalbuphine or "en 2234a" or "en-2234a" or en2234a or nubain or Nalorphine or allylnormorphine or lethidrone or Naloxone or Nalone or Naloxon or Narcan or Narcanti or "mrz 2593" or "mrz 2593 br" or "mrz 2593-br" or "mrz 2593br" or "mrz-2593" or "mrz2593" or Naltrexone or antaxone or celupan or "en 1639a" or "en-1639a" or en1639a or nalorex or nemexin or revia or trexan or Noscapine or capval or "librochin prikkelhoest" or narcotine or noscapect or tuscalman or Papaverine or cerespan or pavabid or pavatym or pilocarpine or isopilocarpine or isoptocarpine or ocusert or salagen) )  
25,420

S19 TI ( ("6029 m" or 6029m or acemethadone or acetylmethadol or adolonta or alfenta or Alfentanil or alfentanyl or algopan or alphacetylmethadol or Alphaprodine or amadol or amidone or amidolacetate or "apo-butorphanol" or ardinex or "bc 2627" or "bc-2627" or bc2627 or beforal or beta-casomorphins or "beta casomorphins" or biodalgic or biodone or biokanol or biopon or Buprenorphine or buprenex or buprex or Butorphanol or carfentanil or Codeine or codinovo or cofapon or contramal or dago or dagol or damage or damgo or demerol or dermorphin or desomorphine or Dextromoramide or Dextropropoxyphene or dezocine or diacetylmorphine or diagesil or diamorf or diamorphine or dicodid or dihydrocodeinone or dihydrocodeine or dihydrohydroxycodeinone or dihydrone or Dihydromorphine or dihydromorphinone or dilaudid or dimepheptanol or dimethylmeperidine or dinarkon or dionine or Diphenoxylate or dipidolor or dipydolor or "d moramide" or "d-moramide" or dolantin or dolargan or dolcontral or dolin or dolophine or dolorex or dolosal or dolsin or dpdpe or dplpe or duragesic or duramorph or durogesic or "en 2234a" or "en-2234a" or en2234a or endomorphin or Enkephalin or eseroline or ethylketazocine or Ethylketocyclazocine or Ethylmorphine or Etorphine or ethorphine or eucodal or fanaxal or fenoperidine or fentanest or Fentanyl or fentora or fortral or "go 1261" or "go-1261" or go1261 or Heroin or hycodan or hycon or hydrocodeinonebitartrate or hydrocodon or Hydrocodone or hydromorphon or Hydromorphone isocodeine or isonipeccain or isopromedol or jutadol or "k 315" or "k-315" or k315 or ketobemidone or laam or laudacon or laudanon or laudanum or "l dromoran" or "l-dromoran" or lealgin or levoacetylmethadol or levomethadyl or "levo dromoran" or "levo-dromoran" or levodromoran or levodroman or levorphan or Levorphanol or lexis or lidol or limifen or lofentanil or lydol or m99 or Meperidine or Meptazinol or meptid or metadol or metasedin or methaddict or methadol or methadyl or "Methadyl Acetate" or methylmorphinan or Methadone or methadose or methex or moradol or Morphine or morphines or morphia or "ms contin" or "mtw tramadol" or "mtw-tramadol" or "mtwtramadol" or Nalbuphine or narcotic\* or narphen or nepenthe or nisentil or "n methylmorphine" or "n-methylmorphine" or nobligan or nocistatin or normethadone or nubain or numorphan or omnopon or opana or operidine or opial or opioid\* or opioid\* or opiate\* or Opium\* or operidine or opon or oposal or orlaam or oxiconum or oxycodonein or Oxycodone or Oxymorphone or oxycone or oxycontin or palfium or palladone or pancodine or papaveretum or pantopon\* or paramorfan or paramorphan or pavon or Pentazocine or pethidine or phenadone or Phenazocine or phenbenzorphin or phenethylazocine or Phenoperidine or phentanyl or phymet or physeptone or pinadone or Pirinitramide or piritramid or piritramide or prefin or prodine or propoxyphene or Promedol or prontofort or protopine or pyrrolamidol or "r 1406" or "r-1406" or r1406 or "r 30730" or "r-30730" or r30730 or "r 39209" or "r-39209" or r39209 or "r 4263" or "r-4263" or r2463 or "ranitidin 1a pharma" or rapifen or remifentanil or "rx 6029 m" or rx6029m or "rx 783006" or "rx-783006" or stadol or sublimaze or suboxone or sufenta or Sufentanil or sufentanilhameln or sufentanilratiopharm or sulfentanil or sulfentanyl or symoron or talwin or takadol or temgesic or tetrapon or theocodin or theradol or tilidate or tilidin or Tilidine or tiral or topalgic or torbugesic or tradol or tradolpuren or tradonal or tralgiol or "trama 1a pharma" or "trama abz" or "trama dorsch" or "trama kd" or "trama-dorsch" or tramadorsch or tramabeta or tramadin or tramadoc or Tramadol or tramadoldolgit or tramadolhameln or tramadolol or tramadolratiopharm or tramadura or tramagetic or tramagit or tramake or tramal or tramex or tramundin or trasedal or trimeperidine or ultram or valerone or valerone or "win 35197 2" or "win-35197-2" or win351972 or "wy 22811" or "wy-22811" or wy22811 or "xymel 50" or zamudol or zumalgic or zydol or zytram ) OR AB ( ("6029 m" or 6029m or acemethadone or acetylmethadol or adolonta or alfenta or Alfentanil or alfentanyl or algopan or alphacetylmethadol or Alphaprodine or amadol or amidone or amidolacetate or "apo-butorphanol" or ardinex or "bc 2627" or "bc-2627" or bc2627 or beforal or beta-casomorphins or "beta casomorphins" or biodalgic or biodone or biokanol or biopon or Buprenorphine or buprenex or buprex or Butorphanol or carfentanil or Codeine or codinovo or cofapon or contramal or dago or dagol or damage or damgo or demerol or dermorphin or desomorphine or Dextromoramide or Dextropropoxyphene or dezocine or diacetylmorphine or diagesil or diamorf or diamorphine or dicodid or dihydrocodeinone or dihydrocodeine or dihydrohydroxycodeinone or dihydrone or Dihydromorphine or dihydromorphinone or dilaudid or dimepheptanol or dimethylmeperidine or dinarkon or dionine or Diphenoxylate or dipidolor or dipydolor or "d moramide" or "d-moramide" or dolantin or dolargan or dolcontral or dolin or dolophine or dolorex or dolosal or dolsin or dpdpe or dplpe or duragesic or duramorph or durogesic or "en 2234a" or "en-2234a" or en2234a or endomorphin or Enkephalin or eseroline or ethylketazocine or Ethylketocyclazocine or Ethylmorphine or Etorphine or ethorphine or eucodal or fanaxal or fenoperidine or fentanest or Fentanyl or fentora or fortral or "go 1261" or "go-1261" or go1261 or Heroin or hycodan or hycon or hydrocodeinonebitartrate or hydrocodon or Hydrocodone or hydromorphon or Hydromorphone isocodeine or isonipeccain or isopromedol or jutadol or "k 315" or "k-315" or k315 or ketobemidone or laam or laudacon or laudanon or laudanum or "l dromoran" or "l-dromoran" or lealgin or levoacetylmethadol or levomethadyl or "levo dromoran" or "levo-dromoran" or levodromoran or levodroman or levorphan or Levorphanol or lexis or lidol or limifen or lofentanil or lydol or m99 or Meperidine or Meptazinol or meptid or metadol or metasedin or methaddict or methadol or

methadyl or "Methadyl Acetate" or methylmorphinan or Methadone or methadose or methex or moradol or Morphine or morphines or morphia or "ms contin" or "mtw tramadol" or "mtw-tramadol" or "mtwtramadol" or Nalbuphine or narcotic\* or narphen or nepenthe or nisentil or "n methylmorphine" or "n-methylmorphine" or nobligan or nocistatin or normethadone or nubain or numorphan or omnopon or opana or operidine or opial or opioid\* or opiod\* or opiate\* or Opium\* or operidine or opon or oposal or orlaam or oxiconum or oxycodone or Oxycodone or Oxymorphone or oxycone or oxycontin or palfium or palladone or pancodine or papaveretum or pantopon\* or paramorfan or paramorphan or pavon or Pentazocine or pethidine or phenadone or Phenazocine or phenbenzorphin or phenethylazocine or Phenoperidine or phentanyl or phymet or physeptone or pinadone or Pirinitramide or piritramid or piritramide or prefin or prodine or propoxyphene or Promedol or prontofort or protopine or pyrrolamidol or "r 1406" or "r-1406" or r1406 or "r 30730" or "r-30730" or r30730 or "r 39209" or "r-39209" or r39209 or "r 4263" or "r-4263" or r2463 or "ranitidin 1a pharma" or rapifen or remifentanil or "rx 6029 m" or rx6029m or "rx 783006" or "rx-783006" or stadol or sublimaze or suboxone or sufenta or Sufentanil or sufentanilhameln or sufentanilratiopharm or sulfentanil or sulfentanyl or symoron or talwin or takadol or temgesic or tetrapon or theocodin or theradol or tilidate or tilidin or Tilidine or tiral or topalgic or torbugesic or tradol or tradolpuren or tradonal or tralgiol or "trama 1a pharma" or "trama abz" or "trama dorsch" or "trama kd" or "trama-dorsch" or tramadorsch or tramabeta or tramadin or tramadoc or Tramadol or tramadololdgit or tramadolhameln or tramador or tramadolratiopharm or tramadura or tramagetic or tramagit or tramake or tramal or tramex or tramundin or trasedal or trimeperidine or ultram or valerone or valerone or "win 35197 2" or "win-35197-2" or win351972 or "wy 22811" or "wy-22811" or wy22811 or "xymel 50" or zamudol or zumalgic or zydol or zytram )

62,529

S18 (MH "Narcotics+") 39,661

S17 (MH "Opioid Epidemic") OR (MH "Opiate Overdose") 366

S16 (MH "Analgesics, Opioid+") 40,139

S15 TI ( ((opioid\* or opiate\* or heroin or morphine\* or narcotic\* or opium\*) N2 (abuse\* or addict\* or dependenc\* or disorder\* or habit\* or misuse\* or overdos\* or problem\* or use\* or usage\*)) ) OR AB ( ((opioid\* or opiate\* or heroin or morphine\* or narcotic\* or opium\*) N2 (abuse\* or addict\* or dependenc\* or disorder\* or habit\* or misuse\* or overdos\* or problem\* or use\* or usage\*)) )

21,783

S14 S5 OR S12 OR S13 73,656

S13 (S1 OR S2 OR S6 OR S7 OR S8 OR S9) NOT S11 50,814

S12 (S1 OR S2 OR S6 OR S7 OR S8 OR S9) AND S10 40,758

S11 (MH "Male") NOT (MH "Male" AND MH "Female") 360,143

S10 (MH "Female") OR TI ( (female\* or woman\* or women\* or maternal\* or mother\* or girl\* or pregnan\*) ) OR AB ( (female\* or woman\* or women\* or maternal\* or mother\* or girl\* or pregnan\*) )

2,250,714

S9 (MH "Reproductive Behavior") 12

S8 TI ( (antifertility or "Antispermatogetic Agent\*" or "coitus interruptus" or condom\* or contraceptive\* or contraception\* or "cyproterone acetate" or dienogest or Gossypol or lonidamine or medroxyprogesterone or molinate or "p-coumaric acid" or triptolide or "intravasal thread" or "reproductive right\*") ) OR AB ( (antifertility or "Antispermatogetic Agent\*" or "coitus interruptus" or condom\* or contraceptive\* or contraception\* or "cyproterone acetate" or dienogest or Gossypol or lonidamine or medroxyprogesterone or molinate or "p-coumaric acid" or triptolide or "intravasal thread" or "reproductive right\*") ) 30,671

S7 (MH "Reproductive Control Agents") OR (MH "Abortifacient Agents") OR (MH "Carboprost") OR (MH "Mifepristone") OR (MH "Misoprostol") 3,109

S6 (MH "Contraception") OR (MH "Hormonal Contraception") OR (MH "Ovulation Inhibition") OR (MH "Rhythm Method") 11,056

S5 S3 OR S4 48,412

S4 TI ( (anticonception or antiovlut\* or ((birth or fertility or population) N1 control) or "family planning" or immunocontracepti\* or ((block\* or inhibit\* or prevent\*) N1 (fertilization or fertilisation)) or LARCs or "long acting reversible contracepti\*" or "reversible long-acting contracepti\*" or (ovulation N1 (block\* or inhibit\* or suppression)) or ((female or reproductive) N2 sterilization) or "intrauterine device\*" or ((contraceptive or copper\* or hormon\* or unmedicated) N1 (IUD or IUDs))) ) OR AB ( (anticonception or antiovlut\* or ((birth or fertility or population) N1 control) or "family planning" or immunocontracepti\* or ((block\* or inhibit\* or prevent\*) N1 (fertilization or fertilisation)) or LARCs or "long acting reversible contracepti\*" or "reversible long-acting contracepti\*" or (ovulation N1 (block\* or inhibit\* or suppression)) or ((female or reproductive) N2 sterilization) or "intrauterine device\*" or ((contraceptive or copper\* or hormon\* or unmedicated) N1 (IUD or IUDs))) )

S3 TI ( ("4 diisobutylphenoxypolyethoxyethanol" or aborti\* or algestone or alpagelle or anordiol or anordrin or anticonceptive or antifertility or anti-fertility or "benzethonium chloride plus nonoxinol 9" or "birth control" or "Bisecurin I" or "camphor plus eucalyptus oil plus gum benzoin plus menthol plus polidocanol" or "carbopol 974p" or "cellulose sulfate" or centchroman or "Cervical Cap\*" or chlormadinone or "chorionic gonadotropin vaccine\*" or "citric acid plus lactic acid plus potassium bitartrate" or Cloprostenol or "Coiled Spring\*" or "Coitus Interruptus" or "conjugated estrogen\*" or contraception\* or contraceptiv\* or CycloProvera or Cyklabil or Deposiston or desogestrel or "diallyl disulfide" or "diallyl trisulfide" or diethylstilbestrol or dimethisterone or "drospirenone plus ethinylestradiol" or embryotom\* or emmenagogue\* or "estradiol enanthate" or "estradiol plus nomegestrol acetate" or "estradiol valerate plus norethisterone enantate" or estropipate or "Ethinyl Estradiol" or " Ethynodiol Diacetate" or ethinylestradiol or etonogestrel or "etynodiol diacetate plus mestranol" or "female sterilization\*" or "female sterilisation\*" or Femovan or fluprostenol or Gestodene or Gestrinone or immunocontracepti\* or Infecundin or "Intrauterine Device\*" or "IUD" or "IUDs" or kentsin or korlym or "levonorgestrel" or lonidamine or "Luteolytic Agent\*" or "lynestrenol" or Megestrol or "menfegol" or "menstruation inducing agent\*" or "Menstruation-Inducing Agent\*" or mestranol or Mifegyne or Mifeprex or Mifepristone or "morning after pill" or "neem oil" or Non-Ovlon or "Nonidet P-40" or Nonoxynol or Noracycline or norelgestromin or Norethindrone or norethisterone or Norethynodrel or norgestimate or norgestrel or Norgestrienone or Norinyl or NuvaRing or octoxinol or Octoxynol or ormeloxifene or " Ortho Evra" or "ortho 777" or Oviol or "Ovulation Inhibition" or Plumbagin or paraformaldehyde or polidocanol or "postcoit\* pill" or "progestin implant\*" or "ring pessar\*" or " SC-11800 EE" or segesterone or "shelf pessar\*" or "Sperm Immobilizing Agent\*" or " ST 1435" or sulprostone or tanaproget or trestolone or "Triptorelin Pamoate" or Trisequens or tristep or "triton x 100" or "tubal occlusion" or ulipristal or yuehchukene or ((spermicidal or spermatocidal) N3 agent\*) or (vagina\* N3 (diaphragm\* or ring\* or shield\* or sponge\* or pessar\*)) or (prevent\* N3 pregnan\*) or Alesse or Apri or Aranelle or Aviane or Azurette or Balziva or Beyaz or Brevicon or Camrese or Cesia or Cryselle or Cyclessa or Demulen or Desogen or Enpresse or Estrostep or Femcon or Gianvi or Jolessa or Junel or Kariva or Kelnor or Leena or Lessina or Levlen or Levlite or Levora or "Lo/Ovral" or Loestrin or Loryna or LoSeasonique or Low-Ogestrel or Lutera or Lybrel or Microgestin or Min-Ovral or Mircette or Modicon or MonoNessa or Natazia or Necon or Nordette or Norinyl or Nortrel or Ocella or Ogestrel or "Ortho Tri-Cyclen" or "Ortho-Cept" or "Ortho-Cyclen" or "Ortho-Novum" or "Ovcon" or "Portia" or "Previfem" or Quasense or Reclipsen or Safyral or Seasonale or Seasonique or Solia or Sprintec or Sronyx or Syeda or Tilia or "Tri-Legest" or "TriNessa" or Tri-Norinyl or Triphasil or Tri-Previfem or Triquilar or Tri-Sprintec or Trivora or Velivet or Yasmin or Yaz or Zarah or Zenchent or Zeosa or Zovia or Camila or Errin or Heather or Jolivette or Micronor or "Nor-Q.D." or Ovrette or "birth-control" or minipill or norethindrone or norgestrel ) OR AB ( ("4 diisobutylphenoxypolyethoxyethanol" or aborti\* or algestone or alpagelle or anordiol or anordrin or anticonceptive or antifertility or anti-fertility or "benzethonium chloride plus nonoxinol 9" or "birth control" or "Bisecurin I" or "camphor plus eucalyptus oil plus gum benzoin plus menthol plus polidocanol" or "carbopol 974p" or "cellulose sulfate" or centchroman or "Cervical Cap\*" or chlormadinone or "chorionic gonadotropin vaccine\*" or "citric acid plus lactic acid plus potassium bitartrate" or Cloprostenol or "Coiled Spring\*" or "Coitus Interruptus" or "conjugated estrogen\*" or contraception\* or contraceptiv\* or CycloProvera or Cyklabil or Deposiston or desogestrel or "diallyl disulfide" or "diallyl trisulfide" or diethylstilbestrol or dimethisterone or "drospirenone plus ethinylestradiol" or embryotom\* or emmenagogue\* or "estradiol enanthate" or "estradiol plus nomegestrol acetate" or "estradiol valerate plus norethisterone enantate" or estropipate or "Ethinyl Estradiol" or " Ethynodiol Diacetate" or ethinylestradiol or etonogestrel or "etynodiol diacetate plus mestranol" or "female sterilization\*" or "female sterilisation\*" or Femovan or fluprostenol or Gestodene or Gestrinone or immunocontracepti\* or Infecundin or "Intrauterine Device\*" or "IUD" or "IUDs" or kentsin or korlym or "levonorgestrel" or lonidamine or "Luteolytic Agent\*" or "lynestrenol" or Megestrol or "menfegol" or "menstruation inducing agent\*" or "Menstruation-Inducing Agent\*" or mestranol or Mifegyne or Mifeprex or Mifepristone or "morning after pill" or "neem oil" or Non-Ovlon or "Nonidet P-40" or Nonoxynol or Noracycline or norelgestromin or Norethindrone or norethisterone or Norethynodrel or norgestimate or norgestrel or Norgestrienone or Norinyl or NuvaRing or octoxinol or Octoxynol or ormeloxifene or " Ortho Evra" or "ortho 777" or Oviol or "Ovulation Inhibition" or Plumbagin or paraformaldehyde or polidocanol or "postcoit\* pill" or "progestin implant\*" or "ring pessar\*" or " SC-11800 EE" or segesterone or "shelf pessar\*" or "Sperm Immobilizing Agent\*" or " ST 1435" or sulprostone or tanaproget or trestolone or "Triptorelin Pamoate" or Trisequens or tristep or "triton x 100" or "tubal occlusion" or ulipristal or yuehchukene or ((spermicidal or spermatocidal) N3 agent\*) or (vagina\* N3 (diaphragm\* or ring\* or shield\* or sponge\* or pessar\*)) or (prevent\* N3 pregnan\*) or Alesse or Apri or Aranelle or Aviane or Azurette or Balziva or Beyaz or Brevicon or Camrese or Cesia or Cryselle or Cyclessa or Demulen or Desogen or Enpresse or Estrostep or Femcon or Gianvi or Jolessa or Junel or Kariva or Kelnor or Leena or Lessina or Levlen or Levlite or



Levora or "Lo/Ovral" or Loestrin or Loryna or LoSeasonique or Low-Ogestrel or Lutera or Lybrel or Microgestin or Min-Ovral or Mircette or Modicon or MonoNessa or Natazia or Necon or Nordette or Norinyl or Nortrel or Ocella or Ogestrel or "Ortho Tri-Cyclen" or "Ortho-Cept" or "Ortho-Cyclen" or "Ortho-Novum" or "Ovcon" or "Portia" or "Previfem" or Quasense or Reclipsen or Safyral or Seasonale or Seasonique or Solia or Sprintec or Sronyx or Syeda or Tilia or "Tri-Legest" or "TriNessa" or Tri-Norinyl or Triphasil or Tri-Previfem or Triquilar or Tri-Sprintec or Trivora or Velivet or Yasmin or Yaz or Zarah or Zenchent or Zeosa or Zovia or Camila or Errin or Heather or Jolivet or Micronor or "Nor-Q.D." or Ovrette or "birth-control" or minipill or norethindrone or norgestrel )

41,561

S2 (MH "Contraceptive Devices") OR (MH "Cervical Caps") OR (MH "Condoms+") OR (MH "Diaphragms, Contraceptive") OR (MH "Intrauterine Devices") OR (MH "Female Condoms")

11,664

S1 (MH "Contraceptive Agents") OR (MH "Contraceptive Agents, Hormonal+") OR (MH "Contraceptives, Oral+") OR (MH "Contraceptives, Postcoital+") OR (MH "Spermatocidal Agents")

24,059

**APA PsycINFO (Ebscohost) August 3, 2021**

Field tags: = DE = Descriptor | TI = title | AB = abstract | KW = keyword

S33 S31 OR S32 1,202

S32 S11 and S23 and S30 1,136

S31 S11 and S20 and S30 183

S30 S24 OR S25 OR S26 OR S27 OR S28 OR S29 1,141,501

S29 TI ( access or perception\* or barrier\* ) OR AB ( access or perception\* or barrier\* )  
465,464

S28 TI ( ((access\* or availabilit\*) N2 ("health service\*" or healthcare or "health care" or contracept\* or therapy or therapies or treatment\*)) ) OR AB ( ((access\* or availabilit\*) N2 ("health service\*" or healthcare or "health care" or contracept\* or therapy or therapies or treatment\*)) ) 15,614

S27 TI ( (counsel\* or program\* or service\*) ) OR AB ( (counsel\* or program\* or service\*) )  
711,321

S26 TI ( (community N2 ("health service\*" or healthcare or "health care" or nursing)) ) OR AB ( (community N2 ("health service\*" or healthcare or "health care" or nursing)) ) 6,978

S25 TI ( (((contracepti\* or reproducti\* or "family planning" or maternal or pregnan\*) N2 (care or center\* or centre\* or clinic or clinics or counsel\* or program\* or service\*)) or (women\* N2 "health service\*") or (preconception N2 (care or program\* or service\*))) ) OR AB ( (((contracepti\* or reproducti\* or "family planning" or maternal or pregnan\*) N2 (care or center\* or centre\* or clinic or clinics or counsel\* or program\* or service\*)) or (women\* N2 "health service\*") or (preconception N2 (care or program\* or service\*))) ) 10,054

S24 DE "Health Care Services" OR DE "Preventive Health Services" OR DE "Public Health Services" OR DE "Community Services" OR DE "Community Mental Health Services" OR DE "Community Welfare Services" OR DE "Emergency Services" OR DE "Home Care" OR DE "Home Visiting Programs" OR DE "Public Health Services" OR DE "Integrated Services" OR DE "Mental Health Programs" OR DE "Crisis Intervention Services" OR DE "Deinstitutionalization" OR DE "Home Visiting Programs" OR DE "Hot Line Services" OR DE "Suicide Prevention Centers" OR DE "Public Health" OR DE "Public Mental Health" OR DE "Public Health Service Nurses" OR DE "Community Health" OR DE "Substance Use Treatment" OR DE "Alcohol Treatment" OR DE "Behavioral Health Services" 162,366

S23 S21 OR S22 186,936

S22 TI ( ((substance\* or alcohol\* or amphetamine\* or cocaine\* or heroin\* or inhalant\* or marijuana\* or cannabis\* or Phencyclidin\* or PCP or "angel dust") N2 (abuse\* or addict\* or dependenc\* or disorder\* or habit\* or misuse\* or overdos\* or problem\* or use\* or usage\*)) ) OR AB ( ((substance\* or alcohol\* or amphetamine\* or cocaine\* or heroin\* or inhalant\* or marijuana\* or cannabis\* or Phencyclidin\* or PCP or "angel dust") N2 (abuse\* or addict\* or dependenc\* or disorder\* or habit\* or misuse\* or overdos\* or problem\* or use\* or usage\*)) ) E  
151,094

S21 DE "Substance Use Disorder" OR DE "Addiction" OR DE "Alcohol Use Disorder" OR DE "Cannabis Use Disorder" OR DE "Drug Abuse" OR DE "Drug Dependency" OR DE "Inhalant Abuse" OR DE "Drug Addiction" OR DE "Drug Withdrawal" 88,792

S20 S12 OR S13 OR S14 OR S15 OR S16 OR S17 OR S18 OR S19 55,060

S19 TI ( ((opioid\* or opiate\* or heroin or morphine\* or narcotic\* or opium\*) N2 (abuse\* or addict\* or dependenc\* or disorder\* or habit\* or misuse\* or overdos\* or problem\* or use\* or usage\*)) ) OR AB ( ((opioid\* or

opiate\* or heroin or morphine\* or narcotic\* or opium\*) N2 (abuse\* or addict\* or dependenc\* or disorder\* or habit\* or misuse\* or overdos\* or problem\* or use\* or usage\*)) )  
19,555

S18 TI ( ("Opiate Alkaloids" or Morphinans or Benzomorphans or Benzomorphan or Pentazocine or forttral or lexir or talwin or Phenazocine or narphen or phenbenzorphane or phenethylazocine or Buprenorphine or "6029 m" or 6029m or buprenex or buprex or prefin or "rx 6029 m" or rx6029m or temgesic or suboxone or Butorphanol or "apo-butorphanol" or "bc 2627" or "bc-2627" or bc2627 or beforal or dolorex or moradol or stadol or torbugesic or Dextromethorphan or delsym or levomethorphan or racemethorphan or "d-methorphan" or "l-methorphan" or Dextrorphan or methylmorphinan or Diprenorphine or revivon or Etorphine or ethorphine or m66 or Levallorphan or lorfane or naloxiphan or Levorphanol or "l dromoran" or "l-dromoran" or "levo dromoran" or "levo-dromoran" or levodromoran or levodromane or levorphanol or "Morphine Derivatives" or Codeine or ardinex or isocodeine or "n methylmorphine" or "n-methylmorphine" or Hydrocodone or codinovo or dicodid or dihydrocodeinone or hycodan or hycon or hydrocodeinonebitartrate or hydrocodone or Oxycodone or dihydrohydroxycodone or dihydron or dinarkon or eucodal or oxiconum or oxycodone or oxycone or oxycontin or pancodine or theocodin or Dihydromorphine or paramorfan or paramorphane or Ethylmorphine or dionine or ethomorphine or ethylmorphine or Heroin or diacetylmorphine or diagesil or diamorfan or diamorphine or Hydromorphone or dihydromorphinone or dilaudid or hydromorphan or hydromorphone or laudacon or palladone or Morphine or morphia or "ms contin" or duramorph or Oxymorphone or numorphan or opana or Thebaine or Nalbuphine or "en 2234a" or "en-2234a" or en2234a or nubain or Nalorphine or allylnormorphine or lethidrone or Naloxone or Nalone or Naloxon or Narcan or Narcanti or "mrz 2593" or "mrz 2593 br" or "mrz 2593-br" or "mrz 2593br" or "mrz-2593" or "mrz2593" or Naltrexone or antaxone or celupan or "en 1639a" or "en-1639a" or en1639a or nalorex or nemexin or revia or trexan or Noscapine or capval or "librochin prikkelhoest" or narcotine or noscapect or tuscalman or Papaverine or cerespan or pavabid or pavatym or pilocarpine or isopilocarpine or isoptocarpine or ocusert or salagen) ) OR AB ( ("Opiate Alkaloids" or Morphinans or Benzomorphans or Benzomorphan or Pentazocine or forttral or lexir or talwin or Phenazocine or narphen or phenbenzorphane or phenethylazocine or Buprenorphine or "6029 m" or 6029m or buprenex or buprex or prefin or "rx 6029 m" or rx6029m or temgesic or suboxone or Butorphanol or "apo-butorphanol" or "bc 2627" or "bc-2627" or bc2627 or beforal or dolorex or moradol or stadol or torbugesic or Dextromethorphan or delsym or levomethorphan or racemethorphan or "d-methorphan" or "l-methorphan" or Dextrorphan or methylmorphinan or Diprenorphine or revivon or Etorphine or ethorphine or m66 or Levallorphan or lorfane or naloxiphan or Levorphanol or "l dromoran" or "l-dromoran" or "levo dromoran" or "levo-dromoran" or levodromoran or levodromane or levorphanol or "Morphine Derivatives" or Codeine or ardinex or isocodeine or "n methylmorphine" or "n-methylmorphine" or Hydrocodone or codinovo or dicodid or dihydrocodeinone or hycodan or hycon or hydrocodeinonebitartrate or hydrocodone or Oxycodone or dihydrohydroxycodone or dihydron or dinarkon or eucodal or oxiconum or oxycodone or oxycone or oxycontin or pancodine or theocodin or Dihydromorphine or paramorfan or paramorphane or Ethylmorphine or dionine or ethomorphine or ethylmorphine or Heroin or diacetylmorphine or diagesil or diamorfan or diamorphine or Hydromorphone or dihydromorphinone or dilaudid or hydromorphan or hydromorphone or laudacon or palladone or Morphine or morphia or "ms contin" or duramorph or Oxymorphone or numorphan or opana or Thebaine or Nalbuphine or "en 2234a" or "en-2234a" or en2234a or nubain or Nalorphine or allylnormorphine or lethidrone or Naloxone or Nalone or Naloxon or Narcan or Narcanti or "mrz 2593" or "mrz 2593 br" or "mrz 2593-br" or "mrz 2593br" or "mrz-2593" or "mrz2593" or Naltrexone or antaxone or celupan or "en 1639a" or "en-1639a" or en1639a or nalorex or nemexin or revia or trexan or Noscapine or capval or "librochin prikkelhoest" or narcotine or noscapect or tuscalman or Papaverine or cerespan or pavabid or pavatym or pilocarpine or isopilocarpine or isoptocarpine or ocusert or salagen) )

29,876

S17 DE "Opiates" OR DE "Codeine" OR DE "Endogenous Opiates" OR DE "Heroin" OR DE "Morphine" OR DE "Papaverine"  
26,323

S16 TI ( ("6029 m" or 6029m or acemethadone or acetylmethadol or adolonta or alfenta or Alfentanil or alfentanyl or algopan or alphacetylmethadol or Alphaprodine or amadol or amidone or amidolacetate or "apo-butorphanol" or ardinex or "bc 2627" or "bc-2627" or bc2627 or beforal or beta-casomorphins or "beta casomorphins" or biodalgic or biodone or biokanol or biopon or Buprenorphine or buprenex or buprex or Butorphanol or carfentanil or Codeine or codinovo or cofapon or contramal or dago or dagol or damge or damgo or demerol or dermorphin or desomorphine or Dextromoramide or Dextropropoxyphene or dezocine or diacetylmorphine or diagesil or diamorfan or diamorphine or dicodid or dihydrocodeinone or dihydrocodeine or dihydrohydroxycodone or dihydron or Dihydromorphine or dihydromorphinone or dilaudid or dimepheptanol or dimethylmeperidine or dinarkon or dionine or Diphenoxylate or dipidolor or dipydolor or "d moramide" or "d-moramide" or dolantin or dolargan or dolcontral or dolin or dolophine or dolorex or dolosal or dolsin or dpdpe or

dplpe or duragesic or duramorph or durogesic or "en 2234a" or "en-2234a" or en2234a or endomorphin or Enkephalin or eseroline or ethylketazocine or Ethylketocyclazocine or Ethylmorphine or Etorphine or ethorphine or eucodal or fanaxal or fenoperidine or fentanest or Fentanyl or fentora or fortral or "go 1261" or "go-1261" or go1261 or Heroin or hycodan or hycon or hydrocodeinonebitartrate or hydrocodon or Hydrocodone or hydromorphon or Hydromorphone isocodeine or isonipeccain or isopromedol or jutadol or "k 315" or "k-315" or k315 or ketobemidone or laam or laudacon or laudanon or laudanum or "l dromoran" or "l-dromoran" or lealgin or levoacetylmethadol or levomethadyl or "levo dromoran" or "levo-dromoran" or levodromoran or levodroman or levorphan or Levorphanol or lexis or lidol or limifen or lofentanil or lydol or m99 or Meperidine or Meptazinol or meptid or metadol or metasedin or methaddict or methadol or methadyl or "Methadyl Acetate" or methylmorphinan or Methadone or methadose or methex or moradol or Morphine or morphines or morphia or "ms contin" or "mtw tramadol" or "mtw-tramadol" or "mtwtramadol" or Nalbuphine or narcotic\* or narphen or nepenthe or nisentil or "n methylmorphine" or "n-methylmorphine" or nobligan or nocistatin or normethadone or nubain or numorphan or omnopon or opana or operidine or opial or opioid\* or opioid\* or opiate\* or Opium\* or operidine or opon or oposal or orlaam or oxiconum or oxycodoneinon or Oxycodone or Oxymorphone or oxycone or oxycontin or palfium or palladone or pancodine or papaveretum or pantopon\* or paramorfan or paramorphan or pavon or Pentazocine or pethidine or phenadone or Phenazocine or phenbenzorphan or phenethylazocine or Phenoperidine or phentanyl or phymet or physeptone or pinadone or Pirinitramide or piritramid or piritramide or prefin or prodine or propoxyphene or Promedol or prontofort or protopine or pyrrolamidol or "r 1406" or "r-1406" or r1406 or "r 30730" or "r-30730" or r30730 or "r 39209" or "r-39209" or r39209 or "r 4263" or "r-4263" or r2463 or "ranitidin 1a pharma" or rapifen or remifentanil or "rx 6029 m" or rx6029m or "rx 783006" or "rx-783006" or stadol or sublimaze or suboxone or sufenta or Sufentanil or sufentanilhameln or sufentanilratiopharm or sulfentanil or sulfentanyl or symoron or talwin or takadol or temgesic or tetrapon or theocodin or theradol or tilidate or tilidin or Tilidine or tiral or topalgic or torbugesic or tradol or tradolpuren or tradonal or tralgiol or "trama 1a pharma" or "trama abz" or "trama dorsch" or "trama kd" or "trama-dorsch" or tramadorsch or tramabeta or tramadin or tramadoc or Tramadol or tramadoldolgit or tramadolhameln or tramador or tramadolratiopharm or tramadura or tramagetic or tramagit or tramake or tramal or tramex or tramundin or trasedal or trimeperidine or ultram or valerone or valerone or "win 35197 2" or "win-35197-2" or win351972 or "wy 22811" or "wy-22811" or wy22811 or "xymel 50" or zamudol or zumalgic or zydol or zytram ) OR AB ( "6029 m" or 6029m or acemethadone or acetylmethadol or adolonta or alfenta or Alfentanil or alfentanyl or algopan or alphacetylmethadol or Alphaprodine or amadol or amidone or amidolacetate or "apo-butorphanol" or ardinex or "bc 2627" or "bc-2627" or bc2627 or beforal or beta-casomorphins or "beta casomorphins" or biodalgic or biodone or biokanol or biopon or Buprenorphine or buprenex or buprex or Butorphanol or carfentanil or Codeine or codinovo or cofapon or contramal or dago or dagol or damge or damgo or demerol or dermorphin or desomorphine or Dextromoramide or Dextropropoxyphene or dezocine or diacetylmorphine or diagesil or diamorf or diamorphine or dicodid or dihydrocodeinone or dihydrocodeine or dihydrohydroxycodoneinone or dihydrone or Dihydromorphine or dihydromorphinone or dilaudid or dimepheptanol or dimethylmeperidine or dinarkon or dionine or Diphenoxylate or dipidolor or dipydolor or "d moramide" or "d-moramide" or dolantin or dolargan or dolcontral or dolin or dolophine or dolorex or dolosal or dolsin or dpdpe or dplpe or duragesic or duramorph or durogesic or "en 2234a" or "en-2234a" or en2234a or endomorphin or Enkephalin or eseroline or ethylketazocine or Ethylketocyclazocine or Ethylmorphine or Etorphine or ethorphine or eucodal or fanaxal or fenoperidine or fentanest or Fentanyl or fentora or fortral or "go 1261" or "go-1261" or go1261 or Heroin or hycodan or hycon or hydrocodeinonebitartrate or hydrocodon or Hydrocodone or hydromorphon or Hydromorphone isocodeine or isonipeccain or isopromedol or jutadol or "k 315" or "k-315" or k315 or ketobemidone or laam or laudacon or laudanon or laudanum or "l dromoran" or "l-dromoran" or lealgin or levoacetylmethadol or levomethadyl or "levo dromoran" or "levo-dromoran" or levodromoran or levodroman or levorphan or Levorphanol or lexis or lidol or limifen or lofentanil or lydol or m99 or Meperidine or Meptazinol or meptid or metadol or metasedin or methaddict or methadol or methadyl or "Methadyl Acetate" or methylmorphinan or Methadone or methadose or methex or moradol or Morphine or morphines or morphia or "ms contin" or "mtw tramadol" or "mtw-tramadol" or "mtwtramadol" or Nalbuphine or narcotic\* or narphen or nepenthe or nisentil or "n methylmorphine" or "n-methylmorphine" or nobligan or nocistatin or normethadone or nubain or numorphan or omnopon or opana or operidine or opial or opioid\* or opioid\* or opiate\* or Opium\* or operidine or opon or oposal or orlaam or oxiconum or oxycodoneinon or Oxycodone or Oxymorphone or oxycone or oxycontin or palfium or palladone or pancodine or papaveretum or pantopon\* or paramorfan or paramorphan or pavon or Pentazocine or pethidine or phenadone or Phenazocine or phenbenzorphan or phenethylazocine or Phenoperidine or phentanyl or phymet or physeptone or pinadone or Pirinitramide or piritramid or piritramide or prefin or prodine or propoxyphene or Promedol or prontofort or protopine or pyrrolamidol or "r 1406" or "r-1406" or r1406 or "r 30730" or "r-30730" or r30730 or "r 39209" or "r-

39209" or r39209 or "r 4263" or "r-4263" or r2463 or "ranitidin 1a pharma" or rapifen or remifentanil or "rx 6029 m" or rx6029m or "rx 783006" or "rx-783006" or stadol or sublimaze or suboxone or sufenta or Sufentanil or sufentanilhameln or sufentanilratiopharm or sulfentanil or sulfentanyl or symoron or talwin or takadol or temgesic or tetrapon or theocodin or theradol or tilidate or tilidin or Tilidine or tiral or topalgic or torbugesic or tradol or tradolpuren or tradonal or tralgiol or "trama 1a pharma" or "trama abz" or "trama dorsch" or "trama kd" or "trama-dorsch" or tramadorsch or tramabeta or tramadin or tramadoc or Tramadol or tramadololdgit or tramadolhameln or tramador or tramadolratiopharm or tramadura or tramagetis or tramagit or tramake or tramal or tramex or tramundin or trasedal or trimeperidine or ultram or valerone or valerone or "win 35197 2" or "win-35197-2" or win351972 or "wy 22811" or "wy-22811" or wy22811 or "xymel 50" or zamudol or zumalgic or zydol or zytram) )  
50,492

S15 DE "Narcotic Drugs" OR DE "Narcotic Agonists" OR DE "Narcotic Antagonists" OR DE "Opiates" OR DE "Opioid Analgesics" 19,977

S14 DE "Opioid Analgesics" OR DE "Buprenorphine" OR DE "Fentanyl" OR DE "Meperidine" OR DE "Methadone" OR DE "Oxycodone" OR DE "Pentazocine"  
8,256

S13 TI ( ((opioid\* or opiate\* or heroin or morphine\* or narcotic\* or opium\*) N2 (abuse\* or addict\* or dependenc\* or disorder\* or habit\* or misuse\* or overdos\* or problem\* or use\* or usage\*)) ) OR AB ( ((opioid\* or opiate\* or heroin or morphine\* or narcotic\* or opium\*) N2 (abuse\* or addict\* or dependenc\* or disorder\* or habit\* or misuse\* or overdos\* or problem\* or use\* or usage\*)) )  
19,555

S12 DE "Opioid Use Disorder" OR DE "Heroin Addiction" OR DE "Morphine Dependence"  
4,762

S11 S4 OR S9 OR S10 29,269

S10 (S1 or S5 or S6) NOT S8 17,236

S9 (S1 or S5 or S6) AND S7 11,311

S8 DE "Human Males" NOT (DE "Human Males" NOT DE "Human Females") 1,828

S7 DE "Human Females" OR DE "Battered Females" OR DE "Daughters" OR DE "Female Criminal Offenders" OR DE "Mothers" OR DE "Sisters" OR DE "Widows" OR DE "Wives" OR DE "Working Women" OR TI ( (female\* or woman\* or women\* or maternal\* or mother\* or girl\* or pregnan\*) ) OR AB ( (female\* or woman\* or women\* or maternal\* or mother\* or girl\* or pregnan\*) )  
757,298

S6 TI ( (antifertility or "Antispermatogetic Agent\*" or "coitus interruptus" or condom\* or contraceptive\* or contraception\* or "cyproterone acetate" or dienogest or Gossypol or lonidamine or medroxyprogesterone or molinate or "p-coumaric acid" or triptolide or "intravasal thread" or "reproductive right\*") ) OR AB ( (antifertility or "Antispermatogetic Agent\*" or "coitus interruptus" or condom\* or contraceptive\* or contraception\* or "cyproterone acetate" or dienogest or Gossypol or lonidamine or medroxyprogesterone or molinate or "p-coumaric acid" or triptolide or "intravasal thread" or "reproductive right\*") ) 17,274

S5 (DE "Birth Control" OR DE "Induced Abortion" OR DE "Reproductive Health" OR DE "Safe Sex" OR DE "Sexual Abstinence") 12,530

S4 S2 OR S3 20,546

S3 TI ( (anticonception or antiovlut\* or ((birth or fertility or population) N1 control) or "family planning" or immunocontracepti\* or ((block\* or inhibit\* or prevent\*) N1 (fertilization or fertilisation)) or LARCs or "long acting reversible contracepti\*" or "reversible long-acting contracepti\*" or (ovulation N1 (block\* or inhibit\* or suppression)) or ((female or reproductive) N2 sterilization) or "intrauterine device\*" or ((contraceptive or copper\* or hormon\* or unmedicated) N1 (IUD or IUDs))) ) OR AB ( (anticonception or antiovlut\* or ((birth or fertility or population) N1 control) or "family planning" or immunocontracepti\* or ((block\* or inhibit\* or prevent\*) N1 (fertilization or fertilisation)) or LARCs or "long acting reversible contracepti\*" or "reversible long-acting contracepti\*" or (ovulation N1 (block\* or inhibit\* or suppression)) or ((female or reproductive) N2 sterilization) or "intrauterine device\*" or ((contraceptive or copper\* or hormon\* or unmedicated) N1 (IUD or IUDs))) )  
6,933

S2 TI ( ("4 diisobutylphenoxypolyethoxyethanol" or aborti\* or algestone or alpagelle or anordiol or anordrin or anticonceptive or antifertility or anti-fertility or "benzethonium chloride plus nonoxinol 9" or "birth control" or "Bisecurin I" or "camphor plus eucalyptus oil plus gum benzoin plus menthol plus polidocanol" or "carbopol 974p" or "cellulose sulfate" or centchroman or "Cervical Cap\*" or chlormadinone or "chorionic gonadotropin vaccine\*" or "citric acid plus lactic acid plus potassium bitartrate" or Cloprostenol or "Coiled Spring\*" or "Coitus Interruptus" or "conjugated estrogen\*" or contraception\* or contraceptiv\* or CycloProvera or Cyklabil or Deposiston or

desogestrel or "diallyl disulfide" or "diallyl trisulfide" or diethylstilbestrol or dimethisterone or "drospirenone plus ethinylestradiol" or embryotom\* or emmenagogue\* or "estradiol enanthate" or "estradiol plus nomegestrol acetate" or "estradiol valerate plus norethisterone enantate" or estropipate or "Ethinyl Estradiol" or "Ethinodiol Diacetate" or ethinylestradiol or etonogestrel or "etynodiol diacetate plus mestranol" or "female sterilization\*" or "female sterilisation\*" or Femovan or fluprostenol or Gestodene or Gestrinone or immunocontracepti\* or Infecundin or "Intrauterine Device\*" or "IUD" or "IUDs" or kentsin or korlym or "levonorgestrel" or lonidamine or "Luteolytic Agent\*" or "lynestrenol" or Megestrol or "menfegol" or "menstruation inducing agent\*" or "Menstruation-Inducing Agent\*" or mestranol or Mifegyne or Mifeprex or Mifepristone or "morning after pill" or "neem oil" or Non-Ovlon or "Nonidet P-40" or Nonoxynol or Noracycline or norelgestromin or Norethindrone or norethisterone or Norethynodrel or norgestimate or norgestrel or Norgestrienone or Norinyl or NuvaRing or octoxinol or Octoxynol or ormeloxifene or " Ortho Evra" or "ortho 777" or Oviol or "Ovulation Inhibition" or Plumbagin or paraformaldehyde or polidocanol or "postcoit\* pill" or "progestin implant\*" or "ring pessar\*" or " SC-11800 EE" or segesterone or "shelf pessar\*" or "Sperm Immobilizing Agent\*" or " ST 1435" or sulprostone or tanaproget or trestolone or "Triptorelin Pamoate" or Trisequens or tristep or "triton x 100" or "tubal occlusion" or ulipristal or yuehchukene or ((spermicidal or spermatocidal) N3 agent\*) or (vagina\* N3 (diaphragm\* or ring\* or shield\* or sponge\* or pessar\*)) or (prevent\* N3 pregnan\*) or Alesse or Apri or Aranelle or Aviane or Azurette or Balziva or Beyaz or Brevicon or Camrese or Cesia or Cryselle or Cyclessa or Demulen or Desogen or Enpresse or Estrostep or Femcon or Gianvi or Jolessa or Junel or Kariva or Kelnor or Leena or Lessina or Levlen or Levlite or Levora or "Lo/Ovral" or Loestrin or Loryna or LoSeasonique or Low-Ogestrel or Lutera or Lybrel or Microgestin or Min-Ovral or Mircette or Modicon or MonoNessa or Natazia or Necon or Nordette or Norinyl or Nortrel or Ocella or Ogestrel or "Ortho Tri-Cyclen" or "Ortho-Cept" or "Ortho-Cyclen" or "Ortho-Novum" or "Ovcon" or "Portia" or "Previfem" or Quasense or Reclipsen or Safyral or Seasonale or Seasonique or Solia or Sprintec or Sronyx or Syeda or Tilia or "Tri-Legest" or "TriNessa" or Tri-Norinyl or Triphasil or Tri-Previfem or Triquilar or Tri-Sprintec or Trivora or Velivet or Yasmin or Yaz or Zarah or Zenchent or Zeosa or Zovia or Camila or Errin or Heather or Jolivette or Micronor or "Nor-Q.D." or Ovrette or "birth-control" or minipill or norethindrone or norgestrel ) OR AB ( "4 diisobutylphenoxyethoxyethanol" or aborti\* or algestone or alpagelle or anordiol or anordrin or anticonceptive or antifertility or anti-fertility or "benzethonium chloride plus nonoxinol 9" or "birth control" or "Bisecurin I" or "camphor plus eucalyptus oil plus gum benzoin plus menthol plus polidocanol" or "carbopol 974p" or "cellulose sulfate" or centchroman or "Cervical Cap\*" or chlormadinone or "chorionic gonadotropin vaccine\*" or "citric acid plus lactic acid plus potassium bitartrate" or Cloprostenol or "Coiled Spring\*" or "Coitus Interruptus" or "conjugated estrogen\*" or contraception\* or contraceptiv\* or CycloProvera or Cyklabil or Deposiston or desogestrel or "diallyl disulfide" or "diallyl trisulfide" or diethylstilbestrol or dimethisterone or "drospirenone plus ethinylestradiol" or embryotom\* or emmenagogue\* or "estradiol enanthate" or "estradiol plus nomegestrol acetate" or "estradiol valerate plus norethisterone enantate" or estropipate or "Ethinyl Estradiol" or "Ethinodiol Diacetate" or ethinylestradiol or etonogestrel or "etynodiol diacetate plus mestranol" or "female sterilization\*" or "female sterilisation\*" or Femovan or fluprostenol or Gestodene or Gestrinone or immunocontracepti\* or Infecundin or "Intrauterine Device\*" or "IUD" or "IUDs" or kentsin or korlym or "levonorgestrel" or lonidamine or "Luteolytic Agent\*" or "lynestrenol" or Megestrol or "menfegol" or "menstruation inducing agent\*" or "Menstruation-Inducing Agent\*" or mestranol or Mifegyne or Mifeprex or Mifepristone or "morning after pill" or "neem oil" or Non-Ovlon or "Nonidet P-40" or Nonoxynol or Noracycline or norelgestromin or Norethindrone or norethisterone or Norethynodrel or norgestimate or norgestrel or Norgestrienone or Norinyl or NuvaRing or octoxinol or Octoxynol or ormeloxifene or " Ortho Evra" or "ortho 777" or Oviol or "Ovulation Inhibition" or Plumbagin or paraformaldehyde or polidocanol or "postcoit\* pill" or "progestin implant\*" or "ring pessar\*" or " SC-11800 EE" or segesterone or "shelf pessar\*" or "Sperm Immobilizing Agent\*" or " ST 1435" or sulprostone or tanaproget or trestolone or "Triptorelin Pamoate" or Trisequens or tristep or "triton x 100" or "tubal occlusion" or ulipristal or yuehchukene or ((spermicidal or spermatocidal) N3 agent\*) or (vagina\* N3 (diaphragm\* or ring\* or shield\* or sponge\* or pessar\*)) or (prevent\* N3 pregnan\*) or Alesse or Apri or Aranelle or Aviane or Azurette or Balziva or Beyaz or Brevicon or Camrese or Cesia or Cryselle or Cyclessa or Demulen or Desogen or Enpresse or Estrostep or Femcon or Gianvi or Jolessa or Junel or Kariva or Kelnor or Leena or Lessina or Levlen or Levlite or Levora or "Lo/Ovral" or Loestrin or Loryna or LoSeasonique or Low-Ogestrel or Lutera or Lybrel or Microgestin or Min-Ovral or Mircette or Modicon or MonoNessa or Natazia or Necon or Nordette or Norinyl or Nortrel or Ocella or Ogestrel or "Ortho Tri-Cyclen" or "Ortho-Cept" or "Ortho-Cyclen" or "Ortho-Novum" or "Ovcon" or "Portia" or "Previfem" or Quasense or Reclipsen or Safyral or Seasonale or Seasonique or Solia or Sprintec or Sronyx or Syeda or Tilia or "Tri-Legest" or "TriNessa" or Tri-Norinyl or Triphasil or Tri-Previfem or Triquilar or Tri-Sprintec or Trivora or Velivet or Yasmin or Yaz or Zarah or Zenchent or Zeosa or Zovia or Camila or Errin or Heather or Jolivette or Micronor or "Nor-Q.D." or Ovrette or "birth-control" or minipill or norethindrone or norgestrel ) )

16,969

S1 (DE "Contraceptive Devices" OR DE "Condoms" OR DE "Diaphragms (Birth Control)" OR DE "Intrauterine Devices" OR DE "Oral Contraceptives")

7,186

**Scopus (Elsevier)**

August 4, 2021

Field tags: TITLE-ABS-KEY = title, abstract, keyword

953 results

(( ( TITLE-ABS-KEY ( "4 diisobutylphenoxypolyethoxyethanol" OR aborti\* OR algestone OR alpagelle OR anordiol OR anordrin OR anticonceptive OR antifertility OR anti-fertility OR "benzethonium chloride plus nonoxinol 9" OR "birth control" OR "Bisecurin I" OR "camphor plus eucalyptus oil plus gum benzoin plus menthol plus polidocanol" OR "carbopol 974p" OR "cellulose sulfate" OR centchroman OR "Cervical Cap\*" OR chlormadinone OR "chorionic gonadotropin vaccine\*" OR "citric acid plus lactic acid plus potassium bitartrate" OR cloprostenol OR "Coiled Spring\*" OR "Coitus Interruptus" OR "conjugated estrogen\*" OR contraception\* OR contraceptiv\* OR cycloprovera OR cyklabil OR deposiston OR desogestrel OR "diallyl disulfide" OR "diallyl trisulfide" OR diethylstilbestrol OR dimethisterone OR "drospirenone plus ethinylestradiol" OR embryotom\* OR emmenagogue\* OR "estradiol enanthate" OR "estradiol plus nomegestrol acetate" OR "estradiol valerate plus norethisterone enantate" OR estropipate OR "Ethinyl Estradiol" OR "Ethinodiol Diacetate" OR ethinylestradiol OR etonogestrel OR "etynodiol diacetate plus mestranol" OR "female sterilization\*" OR "female sterilisation\*" OR femovan OR fluprostenol OR gestodene OR gestrinone OR immunocontracepti\* OR infecundin OR "Intrauterine Device\*" OR "IUD" OR "IUDs" OR kentsin OR korlym OR "levonorgestrel" OR lonidamine OR "Luteolytic Agent\*" OR "lynestrenol" OR megestrol OR "menfegol" OR "menstruation inducing agent\*" OR "Menstruation-Inducing Agent\*" OR mestranol OR mifegyne OR mifeprex OR mifepristone OR "morning after pill" OR "neem oil" OR non-ovlon OR "Nonidet P-40" OR nonoxynol OR noracycline OR norelgestromin OR norethindrone OR norethisterone OR norethynodrel OR norgestimate OR norgestrel OR norgestrienone OR norinyl OR nuvaring OR octoxinol OR octoxynol OR ormeloxifene OR "Ortho Evra" OR "ortho 777" OR oviol OR "Ovulation Inhibition" OR plumbagin OR paraformaldehyde OR polidocanol OR "postcoit\* pill" OR "progestin implant\*" OR "ring pessar\*" OR "SC-11800 EE" OR segesterone OR "shelf pessar\*" OR "Sperm Immobilizing Agent\*" OR "ST 1435" OR sulprostone OR tanaproget OR trestolone OR "Triptorelin Pamoate" OR trisequens OR tristep OR "triton x 100" OR "tubal occlusion" OR ulipristal OR yuehchukene OR ( ( spermicidal OR spermatocidal ) W/3 agent\* ) OR ( vagina\* W/3 ( diaphragm\* OR ring\* OR shield\* OR sponge\* OR pessar\* ) ) OR ( prevent\* W/3 pregnan\* ) OR alesse OR apri OR aranelle OR aviane OR azurette OR balziva OR beyaz OR brevicon OR camrese OR cesia OR cyselle OR cyclessa OR demulen OR desogen OR enpresse OR estrostep OR femcon OR gianvi OR jolessa OR junel OR kariva OR kelnor OR leena OR lessina OR levlen OR levlite OR levora OR "Lo/Ovral" OR loestrin OR loryna OR loseasonique OR low-ogestrel OR lutera OR lybrel OR microgestin OR min-ovral OR mircette OR modicon OR mononessa OR natazia OR necon OR nordette OR norinyl OR nortrel OR ocella OR ogestrel OR "Ortho Tri-Cyclen" OR "Ortho-Cept" OR "Ortho-Cyclen" OR "Ortho-Novum" OR "Ovcon" OR "Portia" OR "Previfem" OR quasense OR reclipsen OR safyral OR seasonale OR seasonique OR solia OR sprintec OR sronyx OR syeda OR tilia OR "Tri-Legest" OR "TriNessa" OR tri-norinyl OR triphasil OR tri-previfem OR triquilar OR tri-sprintec OR trivora OR velivet OR yasmin OR yaz OR zarah OR zenchent OR zeosa OR zovia OR camila OR errin OR heather OR jolivette OR micronor OR ovrlette OR "birth-control" OR minipill OR norethindrone OR norgestrel ) ) OR ( TITLE-ABS-KEY ( anticonception OR antiovlut\* OR ( ( birth OR fertility OR population ) W/1 control ) OR "family planning" OR immunocontracepti\* OR ( ( block\* OR inhibit\* OR prevent\* ) W/1 ( fertilization OR fertilisation ) ) OR larcs OR "long acting reversible contracepti\*" OR "reversible long-acting contracepti\*" OR ( ovulation W/1 ( block\* OR inhibit\* OR suppression ) ) OR ( ( female OR reproductive ) W/2 sterilization ) OR "intrauterine device\*" OR ( ( contraceptive OR copper\* OR hormon\* OR unmedicated ) W/1 ( iud OR iuds ) ) ) ) OR ( TITLE-ABS-KEY ( antifertility OR "Antispermatogetic Agent\*" OR "coitus interruptus" OR condom\* OR contraceptive\* OR contraception\* OR "cyproterone acetate" OR dienogest OR gossypol OR lonidamine OR medroxyprogesterone OR molinate OR "p-coumaric acid" OR triptolide OR "intra-vascular thread" OR "reproductive right\*" ) AND ( female\* OR woman\* OR women\* OR maternal\* OR mother\* OR girl\* OR pregnan\* ) ) OR ( TITLE-ABS-KEY ( ( contracepti\* OR reproduct ) W/2 ( behavior\* OR behaviour\* OR complian\* OR method\* OR usage\* OR "use" ) ) AND ( female\* OR woman\* OR women\* OR maternal\* OR mother\* OR girl\* OR pregnan\* ) ) ) AND ( ( ( TITLE-ABS-KEY ( ( opioid\* OR opiate\* OR heroin OR

morphine\* OR narcotic\* OR opium\*) W/2 ( abuse\* OR addict\* OR dependenc\* OR disorder\* OR habit\* OR misuse\* OR overdos\* OR problem\* OR use\* OR usage\* )) OR ( TITLE-ABS-KEY ( "Opiate Alkaloids" OR morphinans OR benzomorphans OR benzomorphan OR pentazocine OR fortral OR lexis OR talwin OR phenazocine OR narphen OR phenbenzorphane OR phenethylazocine OR buprenorphine OR "6029 m" OR 6029m OR buprenex OR buprex OR prefin OR "rx 6029 m" OR rx6029m OR temgesic OR suboxone OR butorphanol OR "apo-butorphanol" OR "bc 2627" OR "bc-2627" OR bc2627 OR beforal OR dolorex OR moradol OR stadol OR torbugesic OR dextromethorphan OR delysym OR levomethorphan OR racemethorphan OR "d-methorphan" OR "l-methorphan" OR dextrorphan OR methylmorphinan OR diprenorphine OR revivon OR etorphine OR ethorphine OR m66 OR levallorphan OR lorfan OR naloxiphan OR levorphanol OR "l-dromoran" OR "l-dromoran" OR "levo dromoran" OR "levo-dromoran" OR levodromoran OR levodroman OR levorphan OR "Morphine Derivatives" OR codeine OR ardinex OR isocodeine OR "n methylmorphine" OR "n-methylmorphine" OR hydrocodone OR codinovo OR dicodid OR dihydrocodeinone OR hycodan OR hycon OR hydrocodeinonebitartrate OR hydrocodon OR oxycodone OR dihydrohydroxycodone OR dihydron OR dinarkon OR eucodal OR oxiconum OR oxycodone OR oxycone OR oxycontin OR pancodine OR theocodin OR dihydromorphine OR paramorfan OR paramorphan OR ethylmorphine OR dionine OR ethomorphine OR ethylmorphine OR heroin OR diacetylmorphine OR diagesil OR diamorf AND ordiamorphine OR hydromorphone OR dihydromorphinone OR dilaudid OR hydromorphon OR hydromorphone OR laudacon OR palladone OR morphine OR morphia OR "ms contin" OR duramorph OR oxymorphone OR numorphan OR opana OR thebaine OR nalbuphine OR "en 2234a" OR "en-2234a" OR en2234a OR nubain OR nalorphine OR allylnormorphine OR lethidrone OR naloxone OR nalone OR naloxon OR narcan OR narcanti OR "mrz 2593" OR "mrz 2593 br" OR "mrz 2593-br" OR "mrz 2593br" OR "mrz-2593" OR "mrz2593" OR naltrexone OR antaxone OR celupan OR "en 1639a" OR "en-1639a" OR en1639a OR nalorex OR nemexin OR revia OR trexan OR noscapine OR capval OR "librochin prikkelhoest" OR narcotine OR noscapect OR tuscalman OR papaverine OR cerespan OR pavabid OR pavatym OR pilocarpine OR isopilocarpine OR isoptocarpine OR ocusert OR salagen )) OR ( TITLE-ABS-KEY ( ( substance\* OR alcohol\* OR amphetamine\* OR cocaine\* OR heroin\* OR inhalant\* OR marijuana\* OR cannabis\* OR phencyclidin\* OR pcp OR "angel dust" ) W/2 ( abuse\* OR addict\* OR dependenc\* OR disorder\* OR habit\* OR misuse\* OR overdos\* OR problem\* OR use\* OR usage\* )) ) ) AND ( TITLE-ABS ( access OR perception\* OR barrier\* ) ) )

**Web of Science Core Collection (Clarivate)** August 4, 2021

Web of Science Core Collection includes:

Science Citation Index Expanded (SCI-EXPANDED) --1900-2021

Social Sciences Citation Index (SSCI) --1900-2021

Arts & Humanities Citation Index (A&HCI) --1975-2021

Emerging Sources Citation Index (ESCI) --2015-2021

Field tags: TS = Topic search

11 (#9) AND #10 1,782

10 (((((TS=(((contracepti\* or reproducti\* or "family planning" or maternal or pregnan\*) NEAR/2 (care or center\* or centre\* or clinic or clinics or counsel\* or program\* or service\*)) or (women\* NEAR/2 "health service\*") or (preconception NEAR/2 (care or program\* or service\*)))))) OR TS=((counsel\* or program\* or service\*)) OR TS=(("health service\*" or ((contracepti\* or community or counseling or dehabituat\* or health or maternal or nursing or rehab\*) NEAR/2 (agency\* or agencies\* or center\* or centre\* or clinic or clinics or program\* or service\*)))) OR TS=((community NEAR/2 ("health service\*" or healthcare or "health care" or nursing)))) OR TS=(((access\* or availabilit\*) NEAR/2 ("health service\*" or healthcare or "health care" or contracept\* or therapy or therapies or treatment\*)))) OR TS=((access or perception\* or barrier\*) ) 4,392,408

9 (#6) AND (#7 or #8) 4,851

8 TS=(((substance\* or alcohol\* or amphetamine\* or cocaine\* or heroin\* or inhalant\* or marijuana\* or cannabis\* or Phencyclidin\* or PCP or "angel dust") NEAR/2 (abuse\* or addict\* or dependenc\* or disorder\* or habit\* or misuse\* or overdos\* or problem\* or use\* or usage\*)) 232,965

7 ((TS=(((opioid\* or opiate\* or heroin or morphine\* or narcotic\* or opium\*) NEAR/2 (abuse\* or addict\* or dependenc\* or disorder\* or habit\* or misuse\* or overdos\* or problem\* or use\* or usage\*)))) OR TS=(("6029 m" or 6029m or acemethadone or acetylmethadol or adolonta or alfenta or Alfentanil or alfentanyl or algopan or alphacetylmethadol or Alphaprodine or amadol or amidone or amidolacetate or "apo-butorphanol" or ardinex or "bc 2627" or "bc-2627" or bc2627 or beforal or beta-casomorphins or "beta casomorphins" or biodalgin or biodone

or biokanol or biopon or Buprenorphine or buprenex or buprex or Butorphanol or carfentanil or Codeine or codinovo or cofapon or contramal or dago or dagol or damge or damgo or demerol or dermorphin or desomorphine or Dextromoramide or Dextropropoxyphene or dezocine or diacetylmorphine or diagesil or diamorf or diamorphine or dicodid or dihydrocodeinone or dihydrocodeine or dihydrohydroxycodone or dihydron or Dihydromorphine or dihydromorphinone or dilaudid or dimepheptanol or dimethylmeperidine or dinarkon or dionine or Diphenoxylate or dipidolor or dipydolor or "d moramide" or "d-moramide" or dolantin or dolargan or dolcontral or dolin or dolophine or dolorex or dolosal or dolsin or dpdpe or dplpe or duragesic or duramorph or durogesic or "en 2234a" or "en-2234a" or en2234a or endomorphin or Enkephalin or eseroline or ethylketazocine or Ethylketocyclazocine or Ethylmorphine or Etorphine or ethorphine or eucodal or fanaxal or fenoperidine or fentanest or Fentanyl or fentora or fortral or "go 1261" or "go-1261" or go1261 or Heroin or hycodan or hycon or hydrocodeinonebitartrate or hydrocodon or Hydrocodone or hydromorphon or Hydromorphone isocodeine or isonipeccain or isopromedol or jutadol or "k 315" or "k-315" or k315 or ketobemidone or laam or laudacon or laudanon or laudanum or "l dromoran" or "l-dromoran" or lealgin or levoacetylmethadol or levomethadyl or "levo dromoran" or "levo-dromoran" or levodromoran or levodroman or levorphan or Levorphanol or lexis or lidol or limifen or lofentanil or lydol or m99 or Meperidine or Meptazinol or meptid or metadol or metasedin or methaddict or methadol or methadyl or "Methadyl Acetate" or methylmorphinan or Methadone or methadose or methex or moradol or Morphine or morphines or morphia or "ms contin" or "mtw tramadol" or "mtw-tramadol" or "mtwtramadol" or Nalbuphine or narcotic\* or narphen or nepenthe or nisentil or "n methylmorphine" or "n-methylmorphine" or nobligan or nocistatin or normethadone or nubain or numorphan or omnopon or opana or operidine or opial or opioid\* or opioid\* or opiate\* or Opium\* or operidine or opon or oposal or orlaam or oxiconum or oxycodone or Oxycodone or Oxymorphone or oxycone or oxycontin or palfium or palladone or pancodine or papaveretum or pantopon\* or paramorfan or paramorphan or pavon or Pentazocine or pethidine or phenadone or Phenazocine or phenbenzorphin or phenethylazocine or Phenoperidine or phentanyl or phymet or physeptone or pinadone or Pirinitramide or piritramid or piritramide or prefin or prodine or propoxyphene or Promedol or prontofort or protopine or pyrrolamidol or "r 1406" or "r-1406" or r1406 or "r 30730" or "r-30730" or r30730 or "r 39209" or "r-39209" or r39209 or "r 4263" or "r-4263" or r2463 or "ranitidin 1a pharma" or rapifen or remifentanil or "rx 6029 m" or rx6029m or "rx 783006" or "rx-783006" or stadol or sublimaze or suboxone or sufenta or Sufentanil or sufentanilhameln or sufentanilratiopharm or sulfentanil or sulfentanyl or symoron or talwin or takadol or temgesic or tetrapon or theocodin or theradol or tilidate or tilidin or Tilidine or tiral or topalgic or torbugesic or tradol or tradolpuren or tradonal or tralgol or "trama 1a pharma" or "trama abz" or "trama dorsch" or "trama kd" or "trama-dorsch" or tramadorsch or tramabeta or tramadin or tramadoc or Tramadol or tramadoldolgit or tramadolhameln or tramadololor or tramadolratiopharm or tramadura or tramagetic or tramagit or tramake or tramal or tramex or tramundin or trasedal or trimeperidine or ultram or valerone or valerone or "win 35197 2" or "win-35197-2" or win351972 or "wy 22811" or "wy-22811" or wy22811 or "xymel 50" or zamudol or zumalgic or zydol or zytram))) OR TS(("Opiate Alkaloids" or Morphinans or Benzomorphans or Benzomorphan or Pentazocine or fortral or lexis or talwin or Phenazocine or narphen or phenbenzorphin or phenethylazocine or Buprenorphine or "6029 m" or 6029m or buprenex or buprex or prefin or "rx 6029 m" or rx6029m or temgesic or suboxone or Butorphanol or "apo-butorphanol" or "bc 2627" or "bc-2627" or bc2627 or beforal or dolorex or moradol or stadol or torbugesic or Dextromethorphan or delysym or levomethorphan or racemethorphan or "d-methorphan" or "l-methorphan" or Dextrophan or methylmorphinan or Diprenorphine or revivon or Etorphine or ethorphine or m66 or Levallorphan or lorfan or naloxiphan or Levorphanol or "l dromoran" or "l-dromoran" or "levo dromoran" or "levo-dromoran" or levodromoran or levodroman or levorphan or "Morphine Derivatives" or Codeine or ardinex or isocodeine or "n methylmorphine" or "n-methylmorphine" or Hydrocodone or codinovo or dicodid or dihydrocodeinone or hycodan or hycon or hydrocodeinonebitartrate or hydrocodon or Oxycodone or dihydrohydroxycodone or dihydron or dinarkon or eucodal or oxiconum or oxycodone or oxycontin or pancodine or theocodin or Dihydromorphine or paramorfan or paramorphan or Ethylmorphine or dionine or ethomorphine or ethylmorphine or Heroin or diacetylmorphine or diagesil or diamorf ordiamorphine or Hydromorphone or dihydromorphinone or dilaudid or hydromorphon or hydromorphone or laudacon or palladone or Morphine or morphia or "ms contin" or duramorph or Oxymorphone or numorphan or opana or Thebaine or Nalbuphine or "en 2234a" or "en-2234a" or en2234a or nubain or Nalorphine or allylnormorphine or lethidrone or Naloxone or Nalone or Naloxon or Narcan or Narcanti or "mrz 2593" or "mrz 2593 br" or "mrz 2593-br" or "mrz 2593br" or "mrz-2593" or "mrz2593" or Naltrexone or antaxone or celupan or "en 1639a" or "en-1639a" or en1639a or nalorex or nemexin or revia or trexan or Noscapine or capval or "librochin prikkelhoest" or narcotine or noscapect or tuscalman or Papaverine or cerespan or pavabid or pavatym or pilocarpine or isopilocarpine or isoptocarpine or ocusert or salagen)) 272,694

6 #3 OR #4 OR #5 247,470



5 TS=((contracepti\* or reproduct) NEAR/2 (behavior\* or behaviour\* or complian\* or method\* or usage\* or "use")) AND TS=((female\* or woman\* or women\* or maternal\* or mother\* or girl\* or pregnan\*)) 18,165

4 TS=((antifertility or "Antispermatogetic Agent\*" or "coitus interruptus" or condom\* or contraceptive\* or contraception\* or "cyproterone acetate" or dienogest or Gossypol or lonidamine or medroxyprogesterone or molinate or "p-coumaric acid" or triptolide or "intravasal thread" or "reproductive right\*") ) AND TS=((female\* or woman\* or women\* or maternal\* or mother\* or girl\* or pregnan\*))57,282

3 #1 OR #2 234,155

2 TS=((anticonception or antiovlut\* or ((birth or fertility or population) NEAR/1 control) or "family planning" or immunocontracepti\* or ((block\* or inhibit\* or prevent\*) NEAR/1 (fertilization or fertilisation)) or LARCs or "long acting reversible contracepti\*" or "reversible long-acting contracepti\*" or (ovulation NEAR/1 (block\* or inhibit\* or suppression)) or ((female or reproductive) NEAR/2 sterilization) or "intrauterine device\*" or ((contraceptive or copper\* or hormon\* or unmedicated) NEAR/1 (IUD or IUDs))) ) 53,393

1 TS=((("4 diisobutylphenoxypolyethoxyethanol" or aborti\* or algestone or alpagelle or anordiol or anordrin or anticonceptive or antifertility or anti-fertility or "benzethonium chloride plus nonoxinol 9" or "birth control" or "Bisecurin I" or "camphor plus eucalyptus oil plus gum benzoin plus menthol plus polidocanol" or "carbopol 974p" or "cellulose sulfate" or centchroman or "Cervical Cap\*" or chlormadinone or "chorionic gonadotropin vaccine\*" or "citric acid plus lactic acid plus potassium bitartrate" or Cloprostenol or "Coiled Spring\*" or "Coitus Interruptus" or "conjugated estrogen\*" or contraception\* or contraceptiv\* or CycloProvera or Cyklabil or Deposiston or desogestrel or "diallyl disulfide" or "diallyl trisulfide" or diethylstilbestrol or dimethisterone or "drospirenone plus ethinylestradiol" or embryotom\* or emmenagogue\* or "estradiol enanthate" or "estradiol plus nomegestrol acetate" or "estradiol valerate plus norethisterone enantate" or estropipate or "Ethinyl Estradiol" or "Ethinodiol Diacetate" or ethinylestradiol or etonogestrel or "etynodiol diacetate plus mestranol" or "female sterilization\*" or "female sterilisation\*" or Femovan or fluprostenol or Gestodene or Gestrinone or immunocontracepti\* or Infecundin or "Intrauterine Device\*" or "IUD" or "IUDs" or kentsin or korlym or "levonorgestrel" or lonidamine or "Luteolytic Agent\*" or "lynestrenol" or Megestrol or "menfegol" or "menstruation inducing agent\*" or "Menstruation-Inducing Agent\*" or mestranol or Mifegyne or Mifeprex or Mifepristone or "morning after pill" or "neem oil" or Non-Ovlon or "Nonidet P-40" or Nonoxynol or Noracycline or norelgestromin or Norethindrone or norethisterone or Norethynodrel or norgestimate or norgestrel or Norgestrienone or Norinyl or NuvaRing or octoxinol or Octoxynol or ormeloxifene or " Ortho Evra" or "ortho 777" or Oviol or "Ovulation Inhibition" or Plumbagin or paraformaldehyde or polidocanol or "postcoit\* pill" or "progestin implant\*" or "ring pessar\*" or "SC-11800 EE" or segesterone or "shelf pessar\*" or "Sperm Immobilizing Agent\*" or " ST 1435" or sulprostone or tanaproget or trestolone or "Triptorelin Pamoate" or Trisequens or tristep or "triton x 100" or "tubal occlusion" or ulipristal or yuehchukene or ((spermicidal or spermatocidal) NEAR/3 agent\*) or (vagina\* NEAR/3 (diaphragm\* or ring\* or shield\* or sponge\* or pessar\*)) or (prevent\* NEAR/3 pregnan\*) or Alesse or Apri or Aranelle or Aviane or Azurette or Balziva or Beyaz or Brevicon or Camrese or Cesia or Cryselle or Cyclessa or Demulen or Desogen or Enpresse or Estrostep or Femcon or Gianvi or Jolessa or Junel or Kariva or Kelnor or Leena or Lessina or Levlen or Levlite or Levora or "Lo/Ovral" or Loestrin or Loryna or LoSeasonique or Low-Ogestrel or Lutera or Lybrel or Microgestin or Min-Ovral or Mircette or Modicon or MonoNessa or Natazia or Necon or Nordette or Norinyl or Nortrel or Ocella or Ogestrel or "Ortho Tri-Cyclen" or "Ortho-Cept" or "Ortho-Cyclen" or "Ortho-Novum" or "Ovcon" or "Portia" or "Previfem" or Quasense or Reclipsen or Safyral or Seasonale or Seasonique or Solia or Sprintec or Sronyx or Syeda or Tilia or "Tri-Legest" or "TriNessa" or Tri-Norinyl or Triphasil or Tri-Previfem or Triquilar or Tri-Sprintec or Trivora or Velivet or Yasmin or Yaz or Zarah or Zenchent or Zeosa or Zovia or Camila or Errin or Heather or Jolivette or Micronor or "Nor-Q.D." or Ovrette or "birth-control" or minipill or norethindrone or norgestrel))

200,585

## Appendix C. Included and excluded studies

### Included Studies (28) Scoping Review Contraception-Opioid

July 19, 2022

- Armstrong, K. A., Kenen, R., & Samost, L. (1991). Barriers to family planning services among patients in drug treatment programs. *Family Planning Perspectives*, 23(6), 264-266, 270.  
<https://ovidsp.ovid.com/ovidweb.cgi?T=JS&CSC=Y&NEWS=N&PAGE=fulltext&D=med3&AN=1786807>
- Bornstein, M., Gipson, J. D., Bleck, R., Sridhar, A., & Berger, A. (2019). Perceptions of Pregnancy and Contraceptive Use: An In-Depth Study of Women in Los Angeles Methadone Clinics. *Women's Health Issues*, 29(2), 176-181. <https://doi.org/https://dx.doi.org/10.1016/j.whi.2018.10.004>
- Collier, K. W., MacAfee, L. K., Kenny, B. M., & Meyer, M. C. (2019). Does co-location of medication assisted treatment and prenatal care for women with opioid use disorder increase pregnancy planning, length of interpregnancy interval, and postpartum contraceptive uptake? *Journal of Substance Abuse Treatment*, 98, 73-77. <https://doi.org/https://dx.doi.org/10.1016/j.jsat.2018.12.001>
- Fischbein, R. L., Lanese, B. G., Falletta, L., Hamilton, K., King, J. A., & Kenne, D. R. (2018). Pregnant or recently pregnant opioid users: contraception decisions, perceptions and preferences. *Contraception & Reproductive Medicine*, 3, 4. <https://doi.org/https://dx.doi.org/10.1186/s40834-018-0056-y>
- Florsheim, O. K., Augustine, D., Van Ligten, M. M., Thiel de Bocanegra, H., & Perry, R. (2020). Understanding Contraceptive Needs of Women Who Inject Drugs in Orange County: A Qualitative Study. *Journal of Addiction Medicine*, 14, 14. <https://doi.org/https://dx.doi.org/10.1097/ADM.0000000000000795>
- Gipson, J. D., Bornstein, M., Berger, A., & Rocca, C. H. (2021). Desire to avoid pregnancy and contraceptive use among female methadone patients in Los Angeles. *Contraception*, 103(5), 322-327.  
<https://doi.org/https://dx.doi.org/10.1016/j.contraception.2021.01.019>
- Handy, C. J., Lange, H. L. H., Manos, B. E., Berlan, E. D., & Bonny, A. E. (2018). A Retrospective Chart Review of Contraceptive Use among Adolescents with Opioid Use Disorder. *Journal of Pediatric and Adolescent Gynecology*, 31(2), 122-127. <https://doi.org/https://dx.doi.org/10.1016/j.jpag.2017.11.002>
- Hathazi, D., Lankenau, S. E., Sanders, B., & Jackson Bloom, J. (2009). Pregnancy and sexual health among homeless young injection drug users. *Journal of Adolescence*, 32(2), 339-355.  
<https://doi.org/https://dx.doi.org/10.1016/j.adolescence.2008.02.001>
- Heil, S. H., Hand, D. J., Sigmon, S. C., Badger, G. J., Meyer, M. C., & Higgins, S. T. (2016). Using behavioral economic theory to increase use of effective contraceptives among opioid-maintained women at risk of unintended pregnancy. *Preventive Medicine*, 92, 62-67. <https://doi.org/10.1016/j.ypmed.2016.06.023>
- Heil, S. H., Melbostad, H. S., Matusiewicz, A. K., Rey, C. N., Badger, G. J., Shepard, D. S., Sigmon, S. C., MacAfee, L. K., & Higgins, S. T. (2021). Efficacy and Cost-Benefit of Onsite Contraceptive Services With and Without Incentives Among Women With Opioid Use Disorder at High Risk for Unintended Pregnancy: A Randomized Clinical Trial. *JAMA Psychiatry*, 14, 14.  
<https://doi.org/https://dx.doi.org/10.1001/jamapsychiatry.2021.1715>
- Hurley, E. A., Duello, A., Finocchiaro-Kessler, S., Goggin, K., Stancil, S., Winograd, R. P., & Miller, M. K. (2020). Expanding Contraception Access for Women With Opioid-Use Disorder: A Qualitative Study of Opportunities and Challenges. *American Journal of Health Promotion*, 34(8), 909-918.  
<https://doi.org/https://dx.doi.org/10.1177/0890117120927327>
- Jones, H. E., Martin, C. E., Andringa, K. R., Ellerson, R. M., Johnson, E., Hairston, E., & KE, O. G. (2021). Sex and female empowerment (SAFE): A randomized trial comparing sexual health interventions for women in treatment for opioid use disorder. *Drug and Alcohol Dependence*, 221, 108634.  
<https://doi.org/https://dx.doi.org/10.1016/j.drugalcdep.2021.108634>

- Kotha, A., Chen, B. A., Lewis, L., Dunn, S., Himes, K. P., & Krans, E. E. (2019). Prenatal intent and postpartum receipt of long-acting reversible contraception among women receiving medication-assisted treatment for opioid use disorder. *Contraception*, 99(1), 36-41. <https://doi.org/https://dx.doi.org/10.1016/j.contraception.2018.08.008>
- Krans, E. E., Bobby, S., England, M., Gedekoh, R. H., Chang, J. C., Maguire, B., Genday, P., & English, D. H. (2018). The Pregnancy Recovery Center: A women-centered treatment program for pregnant and postpartum women with opioid use disorder. *Addictive Behaviors*, 86, 124-129. <https://doi.org/https://dx.doi.org/10.1016/j.addbeh.2018.05.016>
- Leinaar, E., Brooks, B., Johnson, L., & Alamian, A. (2020). Perceived Barriers to Contraceptive Access and Acceptance among Reproductive-Age Women Receiving Opioid Agonist Therapy in Northeast Tennessee. *Southern Medical Journal*, 113(5), 213-218. <https://doi.org/https://dx.doi.org/10.14423/SMJ.0000000000001095>
- Leinaar, E., Johnson, L., Yadav, R., Rahman, A., & Alamian, A. (2019). Healthcare Access, Pregnancy Intention, and Contraceptive Practices Among Reproductive-Aged Women Receiving Opioid Agonist Therapy in Northeast Tennessee. *Southern Medical Journal*, 112(7), 382-386. <https://doi.org/https://dx.doi.org/10.14423/SMJ.0000000000000990>
- MacAfee, L. K., Harfmann, R. F., Cannon, L. M., Kolenic, G., Kusunoki, Y., Terplan, M., & Dalton, V. K. (2020). Sexual and Reproductive Health Characteristics of Women in Substance Use Treatment in Michigan. *Obstetrics and Gynecology*, 135(2), 361-369. <https://doi.org/https://dx.doi.org/10.1097/AOG.0000000000003666>
- MacAfee, L. K., Harfmann, R. F., Cannon, L. M., Minadeo, L., Kolenic, G., Kusunoki, Y., & Dalton, V. K. (2020). Substance Use Treatment Patient and Provider Perspectives on Accessing Sexual and Reproductive Health Services: Barriers, Facilitators, and the Need for Integration of Care. *Substance Use and Misuse*, 55(1), 95-107. <https://doi.org/https://dx.doi.org/10.1080/10826084.2019.1656255>
- Mastey, N., Roe, A. H., Maurer, R., Janiak, E., & Goldberg, A. B. (2020). Contraception After Surgical Abortion in Patients With Opioid Use Disorder. *Women's Health Issues*, 27, 27. <https://doi.org/https://dx.doi.org/10.1016/j.whi.2020.11.012>
- Matusiewicz, A. K., Melbostad, H. S., & Heil, S. H. (2017). Knowledge of and concerns about long-acting reversible contraception among women in medication-assisted treatment for opioid use disorder. *Contraception*, 96(5), 365-369. <https://doi.org/10.1016/j.contraception.2017.07.167>
- McNeely, C. A., Hutson, S., Sturdivant, T. L., Jabson, J. M., & Isabell, B. S. (2019). Expanding Contraceptive Access for Women With Substance Use Disorders: Partnerships Between Public Health Departments and County Jails. *Journal of Public Health Management and Practice*, 25(3), 229-237. <https://doi.org/https://dx.doi.org/10.1097/PHH.0000000000000850>
- Meschke, L. L., McNeely, C., Brown, K. C., & Prather, J. M. (2018). Reproductive Health Knowledge, Attitudes, and Behaviors Among Women Enrolled in Medication-Assisted Treatment for Opioid Use Disorder. *Journal of Women's Health*, 27(10), 1215-1224. <https://doi.org/https://dx.doi.org/10.1089/jwh.2017.6564>
- Parlier, A. B., Fagan, B., Ramage, M., & Galvin, S. (2014). Prenatal care, pregnancy outcomes, and postpartum birth control plans among pregnant women with opiate addictions. *Southern Medical Journal*, 107(11), 676-683. <https://doi.org/https://dx.doi.org/10.14423/SMJ.0000000000000189>
- Perry, R., Landrian, A., McQuade, M., & Thiel de Bocanegra, H. (2020). Contraceptive Need, Intimate Partner Violence, and Reproductive Coercion Among Women Attending a Syringe Exchange Program. *Journal of Addiction Medicine*, 14(4), e70-e75. <https://doi.org/https://dx.doi.org/10.1097/ADM.0000000000000579>

- Rey, C. N., Badger, G. J., Melbostad, H. S., Wachtel, D., Sigmon, S. C., MacAfee, L. K., Dougherty, A. K., & Heil, S. H. (2020). Perceptions of long-acting reversible contraception among women receiving medication for opioid use disorder in Vermont. *Contraception*, 101(5), 333-337. <https://doi.org/https://dx.doi.org/10.1016/j.contraception.2020.01.010>
- Rinehart, D. J., Stowell, M., Collings, A., Durfee, M. J., Thomas-Gale, T., Jones, H. E., & Binswanger, I. (2021). Increasing access to family planning services among women receiving medications for opioid use disorder: A pilot randomized trial examining a peer-led navigation intervention. *Journal of Substance Abuse Treatment*, 126, 108318. <https://doi.org/https://dx.doi.org/10.1016/j.jsat.2021.108318>
- Smith, C., Morse, E., & Busby, S. (2019). Barriers to Reproductive Healthcare for Women With Opioid Use Disorder. *Journal of Perinatal and Neonatal Nursing*, 33(2), E3-E11. <https://doi.org/https://dx.doi.org/10.1097/JPN.0000000000000401>
- Sobel, L., Lee, Y. W., White, K. O., Woodhams, E., & Patton, E. (2021). Contraceptive decision making among pregnancy-capable individuals with opioid use disorder at a tertiary care center in Massachusetts. *Contraception*, 10, 10. <https://doi.org/https://dx.doi.org/10.1016/j.contraception.2021.06.002>

### Excluded studies (55) Scoping Review Contraception-Opioid

July 19, 2022

- Abdul-Khabir, W., Hall, T., Swanson, A. N., & Shoptaw, S. (2014). Intimate partner violence and reproductive health among methamphetamine-using women in los angeles: a qualitative pilot study. *Journal of Psychoactive Drugs*, 46(4), 310-316. <https://doi.org/https://dx.doi.org/10.1080/02791072.2014.934978>  
Exclusion reason: Wrong population opioids below threshold or unknown.
- Ahc, M. (2021). SAFE Intervention Brings Reproductive Health Services to Women in Treatment: Program reduces stigma for women who use opioids. *Contraceptive Technology Update*, 42(5), 1-3. <https://search.ebscohost.com/login.aspx?direct=true&db=ccm&AN=149756137&site=ehost-live>  
Exclusion reason: No methods and results.
- Ayon, S., Jeneby, F., Hamid, F., Badhrus, A., Abdulrahman, T., & Mburu, G. (2019). Developing integrated community-based HIV prevention, harm reduction, and sexual and reproductive health services for women who inject drugs. *Reproductive Health*, 16(Suppl 1), 59. <https://doi.org/https://dx.doi.org/10.1186/s12978-019-0711-z>  
Exclusion reason: Wrong context non-US setting.
- Black, K. I., & Day, C. A. (2016). Improving Access to Long-Acting Contraceptive Methods and Reducing Unplanned Pregnancy Among Women with Substance Use Disorders. *Substance Abuse*, 10(Suppl 1), 27-33. <https://doi.org/https://dx.doi.org/10.4137/SART.S34555>  
Exclusion reason: Narrative review.
- Cabral, R. J., Galavotti, C., Armstrong, K., Morrow, B., & Fogarty, L. (2001). Reproductive and contraceptive attitudes as predictors of condom use among women in an HIV prevention intervention. *Women and Health*, 33(3-4), 117-132. <https://ovidsp.ovid.com/ovidweb.cgi?T=JS&CSC=Y&NEWS=N&PAGE=fulltext&D=med4&AN=11527100>  
Exclusion reason: Wrong concept condoms only.
- Callegari, L. S., Zhao, X., Nelson, K. M., & Borrero, S. (2015). Contraceptive adherence among women Veterans with mental illness and substance use disorder. *Contraception*, 91(5), 386-392. <https://doi.org/10.1016/j.contraception.2015.01.013>  
Exclusion reason: Wrong population opioids below threshold or unknown.
- Callegari, L. S., Zhao, X., Nelson, K. M., Lehavot, K., Bradley, K. A., & Borrero, S. (2014). Associations of mental illness and substance use disorders with prescription contraception use among women veterans. *Contraception*, 90(1), 97-103. <https://doi.org/10.1016/j.contraception.2014.02.028>

Exclusion reason: Wrong population opioids below threshold or unknown.

Centers for Disease, C. (1992). Childbearing and contraceptive-use plans among women at high risk for HIV infection--selected U.S. sites, 1989-1991. *MMWR - Morbidity & Mortality Weekly Report*, 41(8), 135, 141-134.

<https://ovidsp.ovid.com/ovidweb.cgi?T=JS&CSC=Y&NEWS=N&PAGE=fulltext&D=med3&AN=1738361>

Exclusion reason: Wrong concept no contraceptive barriers or facilitators.

Charron, E., Mayo, R. M., Heavner-Sullivan, S. F., Eichelberger, K. Y., Dickes, L., Truong, K. D., & Rennert, L. (2020). "It's a very nuanced discussion with every woman": Health care providers' communication practices during contraceptive counseling for patients with substance use disorders. *Contraception*, 102(5), 349-355. <https://doi.org/https://dx.doi.org/10.1016/j.contraception.2020.09.002>

Exclusion reason: Wrong population no opioids.

Charron, E., Rennert, L., Mayo, R. M., Eichelberger, K. Y., Dickes, L., & Truong, K. D. (2021). Contraceptive initiation after delivery among women with and without opioid use disorders: A retrospective cohort study in a statewide Medicaid population, 2005-2016. *Drug and Alcohol Dependence*, 220, 108533.

<https://doi.org/https://dx.doi.org/10.1016/j.drugalcdep.2021.108533>

Exclusion reason: Wrong concept no contraceptive barriers or facilitators.

Clarke, J. G., Hebert, M. R., Rosengard, C., Rose, J. S., DaSilva, K. M., & Stein, M. D. (2006). Reproductive health care and family planning needs among incarcerated women. *American Journal of Public Health*, 96(5), 834-839.

<https://ovidsp.ovid.com/ovidweb.cgi?T=JS&CSC=Y&NEWS=N&PAGE=fulltext&D=med6&AN=16571701>

Exclusion reason: Wrong concept no contraceptive barriers or facilitators.

Cooper, R. L. (2020 November - ). Averting NAS Among Opioid-Using Young Women Receiving MAT Using Buprenorphine. Identifier NCT04611659. <https://clinicaltrials.gov/show/NCT04611659>

Exclusion reason: Clinical trial registration.

Crandall, L. A., Metsch, L. R., McCoy, C. B., Chitwood, D. D., & Tobias, H. (2003). Chronic drug use and reproductive health care among low-income women in Miami, Florida: a comparative study of access, need, and utilization. *Journal of Behavioral Health Services and Research*, 30(3), 321-331.

<https://ovidsp.ovid.com/ovidweb.cgi?T=JS&CSC=Y&NEWS=N&PAGE=fulltext&D=med5&AN=12875099>

Exclusion reason: Wrong concept no contraceptive barriers or facilitators.

Drescher-Burke, K. (2014). Contraceptive risk-taking among substance-using women. *Qualitative Social Work*, 13(5), 636-653. <https://doi.org/10.1177/1473325013498110>

Exclusion reason: Wrong population opioids below threshold or unknown.

Elko, A., & Jansson, L. M. (2011). Contraception in Drug-Dependent Women: A Novel Approach. *Social Work in Mental Health*, 9(6), 445-455. <https://doi.org/10.1080/15332985.2011.575723>

Exclusion reason: Wrong population opioids below threshold or unknown.

Gallagher, B. K., Yejee, S., Roohan, P., & Shin, Y. (2016). Opioid Prescriptions Among Women of Reproductive Age Enrolled in Medicaid - New York, 2008-2013. *MMWR: Morbidity and Mortality Weekly Report*, 65(16), 415-417. <https://doi.org/10.15585/mmwr.mm6516a2>

Exclusion reason: Wrong concept no contraception.

Gawron, L. M., Redd, A., Suo, Y., Pettey, W., Turok, D. K., & Gundlapalli, A. V. (2017). Long-acting Reversible Contraception among Homeless Women Veterans with Chronic Health Conditions. *Medical Care*, 55(9), S111-S120. <https://doi.org/10.1097/MLR.0000000000000765>

Exclusion reason: Wrong population opioids below threshold or unknown.

- Griffith, G., Kumaraswami, T., Chrysanthopoulou, S. A., Mattocks, K. M., & Clark, R. E. (2017). Prescription contraception use and adherence by women with substance use disorders. *Addiction, 112*(9), 1638-1646. <https://doi.org/10.1111/add.13840>  
Exclusion reason: Wrong concept no contraceptive barriers or facilitators.
- Gutierrez, S. E., & Barr, A. (2003). The relationship between attitudes toward pregnancy and contraception use among drug users. *Journal of Substance Abuse Treatment, 24*(1), 19-29. <https://ovidsp.ovid.com/ovidweb.cgi?T=JS&CSC=Y&NEWS=N&PAGE=fulltext&D=med5&AN=12646327>  
Exclusion reason: Wrong population opioids below threshold or unknown.
- Hagemeier, N. E., Click, I. A., Flippin, H., Gilliam, H., Ross, A., Basden, J. A., & Carico, R., Jr. (2018). Pharmacists' and prescribers' neonatal abstinence syndrome (NAS) prevention behaviors: a preliminary analysis. *International Journal of Clinical Pharmacy, 40*(1), 20-25. <https://doi.org/https://dx.doi.org/10.1007/s11096-017-0573-9>  
Exclusion reason: Wrong population no opioids.
- Heil, S. H. (2011, October - 2014, June). *Improving Effective Contraceptive Use Among Opioid-maintained Women*. Identifier NCT01425060. <https://clinicaltrials.gov/ct2/show/NCT01425060>  
Exclusion reason: Clinical trial registration.
- Heil, S. H. (2015, May - 2019, September). *Improving Effective Contraceptive Use Among Opioid-maintained Women: stage II*. Identifier NCT02411357. <https://clinicaltrials.gov/show/NCT02411357>  
Exclusion reason: Clinical trial registration.
- Heil, S. H., Hand, D. J., Sigmon, S. C., Meyer, M. C., Melbostad, H. S., Matusiewicz, A. K., & Higgins, S. T. (2016). Effective contraceptives among methadone-maintained women at risk of unintended pregnancy: randomized controlled trials. *Heroin Addiction and Related Clinical Problems, 18*(3), 29-. <https://www.cochranelibrary.com/central/doi/10.1002/central/CN-01774109/full>  
Exclusion reason: Abstract only.
- Heil, S. H., Melbostad, H. S., & Rey, C. N. (2019). Innovative approaches to reduce unintended pregnancy and improve access to contraception among women who use opioids. *Preventive Medicine, 128*, 105794. <https://doi.org/https://dx.doi.org/10.1016/j.yjmed.2019.105794>  
Exclusion reason: Narrative review.
- Jemmott, L. S., & Brown, E. J. (2003). Reducing HIV sexual risk among African American women who use drugs: hearing their voices. *Journal of the Association of Nurses in AIDS Care, 14*(1), 19-26. <https://ovidsp.ovid.com/ovidweb.cgi?T=JS&CSC=Y&NEWS=N&PAGE=fulltext&D=med5&AN=12585219>  
Exclusion reason: Wrong concept condoms only.
- Jia, L., & Norman, W. V. (2021). Contraception Practices Among Women on Opioid Agonist Therapy. *Journal of Obstetrics & Gynaecology Canada: JOGC, 43*(2), 204-210. <https://doi.org/https://dx.doi.org/10.1016/j.jogc.2020.06.027>  
Exclusion reason: Wrong context non-US setting.
- Klaman, S. L., Lorvick, J., & Jones, H. E. (2019). Provision of and Barriers to Integrating Reproductive and Sexual Health Services for Reproductive-age Women in Opioid Treatment Programs. *Journal of Addiction Medicine, 13*(6), 422-429. <https://doi.org/https://dx.doi.org/10.1097/ADM.0000000000000519>  
Exclusion reason: Wrong population no opioids.
- Krans, E. (2022, December - ). *Repro Health, Implementation Patient-centered, Reproductive Planning Decision Support Tool (MyPath)*. Identifier NCT04939012. <https://clinicaltrials.gov/show/NCT04939012>  
Exclusion reason: Clinical trial registration.

- Krans, E. E., Kim, J. Y., Iijames, A. E., Kelley, D. K., Jarlenski, M., & James, A. E., 3rd. (2018). Postpartum contraceptive use and interpregnancy interval among women with opioid use disorder. *Drug and Alcohol Dependence*, 185, 207-213. <https://doi.org/10.1016/j.drugalcdep.2017.12.023>  
Exclusion reason: Wrong concept no contraceptive barriers or facilitators.
- Loree, A. M., Gariepy, A., Ruger, J. P., & Yonkers, K. A. (2018). Postpartum Contraceptive use and Rapid Repeat Pregnancy Among Women who use Substances. *Substance Use and Misuse*, 53(1), 162-169. <https://doi.org/10.1080/10826084.2017.1327976>  
Exclusion reason: Wrong population opioids below threshold or unknown.
- MacAfee, L. K., Dalton, V., & Terplan, M. (2019). Pregnancy Intention, Risk Perception, and Contraceptive Use in Pregnant Women Who Use Drugs. *Journal of Addiction Medicine*, 13(3), 177-181. <https://doi.org/https://dx.doi.org/10.1097/ADM.0000000000000471>  
Exclusion reason: Wrong population opioids below threshold or unknown.
- MacAfee, L. K., Harfmann, R., Kolenic, G., & Dalton, V. K. (2017). Barriers to reproductive health services for women with opioid use disorder in substance use treatment across Michigan. *Contraception*, 96(4), 297-. <https://doi.org/10.1016/j.contraception.2017.07.129>  
Exclusion reason: Abstract only.
- Martin, C. E., Terplan, M., O'Grady, K., & Jones, H. E. (2017). Pregnancy intention and opioid use disorder treatment retention in the mother study. *Journal of Addiction Medicine*, 11(3), E12-. <https://doi.org/10.1097/ADM.0000000000000319>  
Exclusion reason: Wrong concept no contraception.
- Medina-Perucha, L., Family, H., Scott, J., Chapman, S., & Dack, C. (2019). Factors Associated with Sexual Risks and Risk of STIs, HIV and Other Blood-Borne Viruses Among Women Using Heroin and Other Drugs: A Systematic Literature Review. *AIDS and Behavior*, 23(1), 222-251. <https://doi.org/https://dx.doi.org/10.1007/s10461-018-2238-7>  
Exclusion reason: Wrong concept no contraception.
- Melbostad, H. S., Badger, G. J., Rey, C. N., MacAfee, L. K., Dougherty, A. K., Sigmon, S. C., & Heil, S. H. (2020). Contraceptive Knowledge among Females and Males Receiving Medication Treatment for Opioid Use Disorder Compared to Those Seeking Primary Care. *Substance Use and Misuse*, 55(14), 2403-2408. <https://doi.org/10.1080/10826084.2020.1823418>  
Exclusion reason: Population women unclear.
- Neale, J., Werthern, H., Alhusein, N., Chater, A., Scott, J., & Family, H. (2021). Contraceptive choice and power amongst women receiving opioid replacement therapy: qualitative study. *Drugs: Education, Prevention & Policy*, 1-12. <https://doi.org/10.1080/09687637.2021.1954599>  
Exclusion reason: Wrong context non-US setting.
- Olioff, J., Shea, T. O., Horan, A., Naughton, A. M., & O'Brien, D. (2019). Cross-sectional study on the need to provide contraceptive services to women attending opioid-replacement therapy. *Heroin Addiction and Related Clinical Problems*, 21(4), 27-34. <https://www.embase.com/search/results?subaction=viewrecord&id=L2002600356&from=export>  
Exclusion reason: Wrong context non-US setting.
- Olsen, A., Banwell, C., & Madden, A. (2014). Contraception, punishment and women who use drugs. *BMC Women's Health*, 14, 5. <https://doi.org/https://dx.doi.org/10.1186/1472-6874-14-5>  
Exclusion reason: Wrong context non-US setting.
- Owens, L., Gilmore, K., Terplan, M., Prager, S., & Micks, E. (2020). Providing reproductive health services for women who inject drugs: A pilot program. *Harm Reduction Journal*, 17(1). <https://doi.org/10.1186/s12954-020-00395-y>  
Exclusion reason: Wrong population opioids below threshold or unknown.

- Owens, L., Micks, E., Moreno, C., & Glick, S. (2020). Reproductive Health Care Utilization by Women Who Inject Drugs and Exchange Sex in the Seattle Area. *Substance Use and Misuse*, 55(12), 2020-2024. <https://doi.org/https://dx.doi.org/10.1080/10826084.2020.1788088>  
Exclusion reason: Wrong concept no contraceptive barriers or facilitators.
- Paterno, M. T., Jablonski, L., Klepacki, A., & Friedmann, P. D. (2019). Evaluation of a Nurse-Led Program for Rural Pregnant Women With Opioid Use Disorder to Improve Maternal-Neonatal Outcomes. *JOGNN - Journal of Obstetric, Gynecologic, & Neonatal Nursing*, 48(5), 495-506. <https://doi.org/https://dx.doi.org/10.1016/j.jogn.2019.07.002>  
Exclusion reason: Wrong concept no contraceptive barriers or facilitators.
- Pivnick, A. (1994). Loss and regeneration: influences on the reproductive decisions of HIV positive, drug-using women. *Medical Anthropology*, 16(1), 39-62. <https://ovidsp.ovid.com/ovidweb.cgi?T=JS&CSC=Y&NEWS=N&PAGE=fulltext&D=med3&AN=7877463>  
Exclusion reason: Wrong concept no contraceptive barriers or facilitators.
- Ray-Griffith, S. L., Chopra, D., Stowe, Z. N., & Martin, B. C. (2019). Claims for contraceptive services among young women filling chronic opioid prescriptions. *Contraception*, 99(5), 296-299. <https://doi.org/https://dx.doi.org/10.1016/j.contraception.2019.01.004>  
Exclusion reason: Wrong concept no contraceptive barriers or facilitators.
- Rinehart, D. (2016, August - 2019, August). *Improving Reproductive Health for Women in Opioid Medication-Assisted Treatment (OMAT)*. Identifier NCT02794597. <https://clinicaltrials.gov/show/NCT02794597>  
Exclusion reason: Clinical trial registration.
- Rinehart, D. (2019, December - ). *Increasing Linkage to Family Planning Care for Individuals With Opioid Use Disorder*. Identifier NCT04162184. <https://clinicaltrials.gov/show/NCT04162184>  
Exclusion reason: Clinical trial registration.
- Robinowitz, N., Muqueeth, S., Scheibler, J., Salisbury-Afshar, E., & Terplan, M. (2016). Family Planning in Substance Use Disorder Treatment Centers: Opportunities and Challenges. *Substance Use and Misuse*, 51(11), 1477-1483. <https://doi.org/https://dx.doi.org/10.1080/10826084.2016.1188944>  
Exclusion reason: Wrong population opioids below threshold or unknown.
- Sadang, K. G., Miller, D., Veloso, D., Lin, J., & McFarland, W. (2021). Unmet Health and Social Welfare Needs of Women Who Inject Drugs in San Francisco. *Journal of Health Care for the Poor and Underserved*, 32(1), N.PAG-N.PAG. <https://doi.org/10.1353/hpu.2021.0019>  
Exclusion reason: Wrong concept no contraceptive barriers or facilitators.
- Shah, S., Hoffman, R., Shinault, R., & LaPoint, S. (1998). Screening for pregnancy and contraceptive use among women admitted to a Denver detoxification center. *Public Health Reports*, 113(4), 336-340. <https://ovidsp.ovid.com/ovidweb.cgi?T=JS&CSC=Y&NEWS=N&PAGE=fulltext&D=med4&AN=9672573>  
Exclusion reason: Wrong concept no contraceptive barriers or facilitators.
- Stone, R. H., Griffin, B., Fusco, R. A., Vest, K., Tran, T., & Gross, S. (2020). Factors Affecting Contraception Access and Use in Patients With Opioid Use Disorder. *Journal of Clinical Pharmacology*, 60 Suppl 2, S63-S73. <https://doi.org/https://dx.doi.org/10.1002/jcph.1772>  
Exclusion reason: Narrative review.
- Swan, L. E. T., Auerbach, S. L., Ely, G. E., Agbemenu, K., Mencia, J., & Araf, N. R. (2020). Family Planning Practices in Appalachia: Focus Group Perspectives on Service Needs in the Context of Regional Substance Abuse. *International Journal of Environmental Research & Public Health [Electronic Resource]*, 17(4), 13. <https://doi.org/https://dx.doi.org/10.3390/ijerph17041198>  
Exclusion reason: Wrong population no opioids.



- Terplan, M., Hand, D. J., Hutchinson, M., Salisbury-Afshar, E., & Heil, S. H. (2015). Contraceptive use and method choice among women with opioid and other substance use disorders: A systematic review. *Preventive Medicine, 80*, 23-31. <https://doi.org/https://dx.doi.org/10.1016/j.ypmed.2015.04.008>  
Exclusion reason: Wrong concept no contraceptive barriers or facilitators.
- Terplan, M., Lawental, M., Connah, M. B., & Martin, C. E. (2016). Reproductive Health Needs Among Substance Use Disorder Treatment Clients. *Journal of Addiction Medicine, 10*(1), 20-25. <https://doi.org/https://dx.doi.org/10.1097/ADM.0000000000000175>  
Exclusion reason: Wrong population opioids below threshold or unknown.
- Thompson, T. A., Ahrens, K. A., & Coplon, L. (2020). Virtually possible: using telehealth to bring reproductive health care to women with opioid use disorder in rural Maine. *Began with 2015, 6*, 41. <https://doi.org/https://dx.doi.org/10.21037/mhealth-19-237>  
Exclusion reason: Wrong population opioids below threshold or unknown.
- Ti, A., Stone, R. H., Whiteman, M., & Curtis, K. M. (2019). Safety and effectiveness of hormonal contraception for women who use opioids: A systematic review. *Contraception, 100*(6), 480-483. <https://doi.org/https://dx.doi.org/10.1016/j.contraception.2019.08.006>  
Exclusion reason: Wrong concept no contraceptive barriers or facilitators.
- Tschann, M., Wright, T., Lusk, H., Giorgio, W., Colon, A., & Kaneshiro, B. (2019). Understanding the Family Planning Needs of Female Participants in a Syringe Exchange Program: A Needs Assessment and Pilot Project. *Journal of Addiction Medicine, 13*(5), 366-371. <https://doi.org/10.1097/ADM.0000000000000508>  
Exclusion reason: Wrong population opioids below threshold or unknown.

**Appendix D.** Data extraction template

|                                                                                                             |  |
|-------------------------------------------------------------------------------------------------------------|--|
| <b>Scoping Review Details</b>                                                                               |  |
| Scoping Review title:                                                                                       |  |
| Review objective/s:                                                                                         |  |
| Review question/s:                                                                                          |  |
| <b>Inclusion/Exclusion Criteria</b>                                                                         |  |
| Population:                                                                                                 |  |
| Concept:                                                                                                    |  |
| Context:                                                                                                    |  |
| Types of source evidence:                                                                                   |  |
| <b>Evidence Source Details and Characteristics</b>                                                          |  |
| Citation details (e.g. author/s, date, title, journal, volume, issue, pages):                               |  |
| Aims/objectives of study:                                                                                   |  |
| Study design:                                                                                               |  |
| Setting/context:                                                                                            |  |
| Participants, sampling strategy, sample size:                                                               |  |
| Opioids used (Rx, street, MOUD and percentage):                                                             |  |
| Aspect of contraception:                                                                                    |  |
| <b>Details/Results extracted from source of evidence</b> (in relation to the concept of the scoping review) |  |
| Key barriers and level of influence:                                                                        |  |
| Key facilitators and level of influence:                                                                    |  |
| Study limitations:                                                                                          |  |
| Study conclusions:                                                                                          |  |
| Other key information or comments:                                                                          |  |

## Appendix E. PRISMA flow chart of included studies

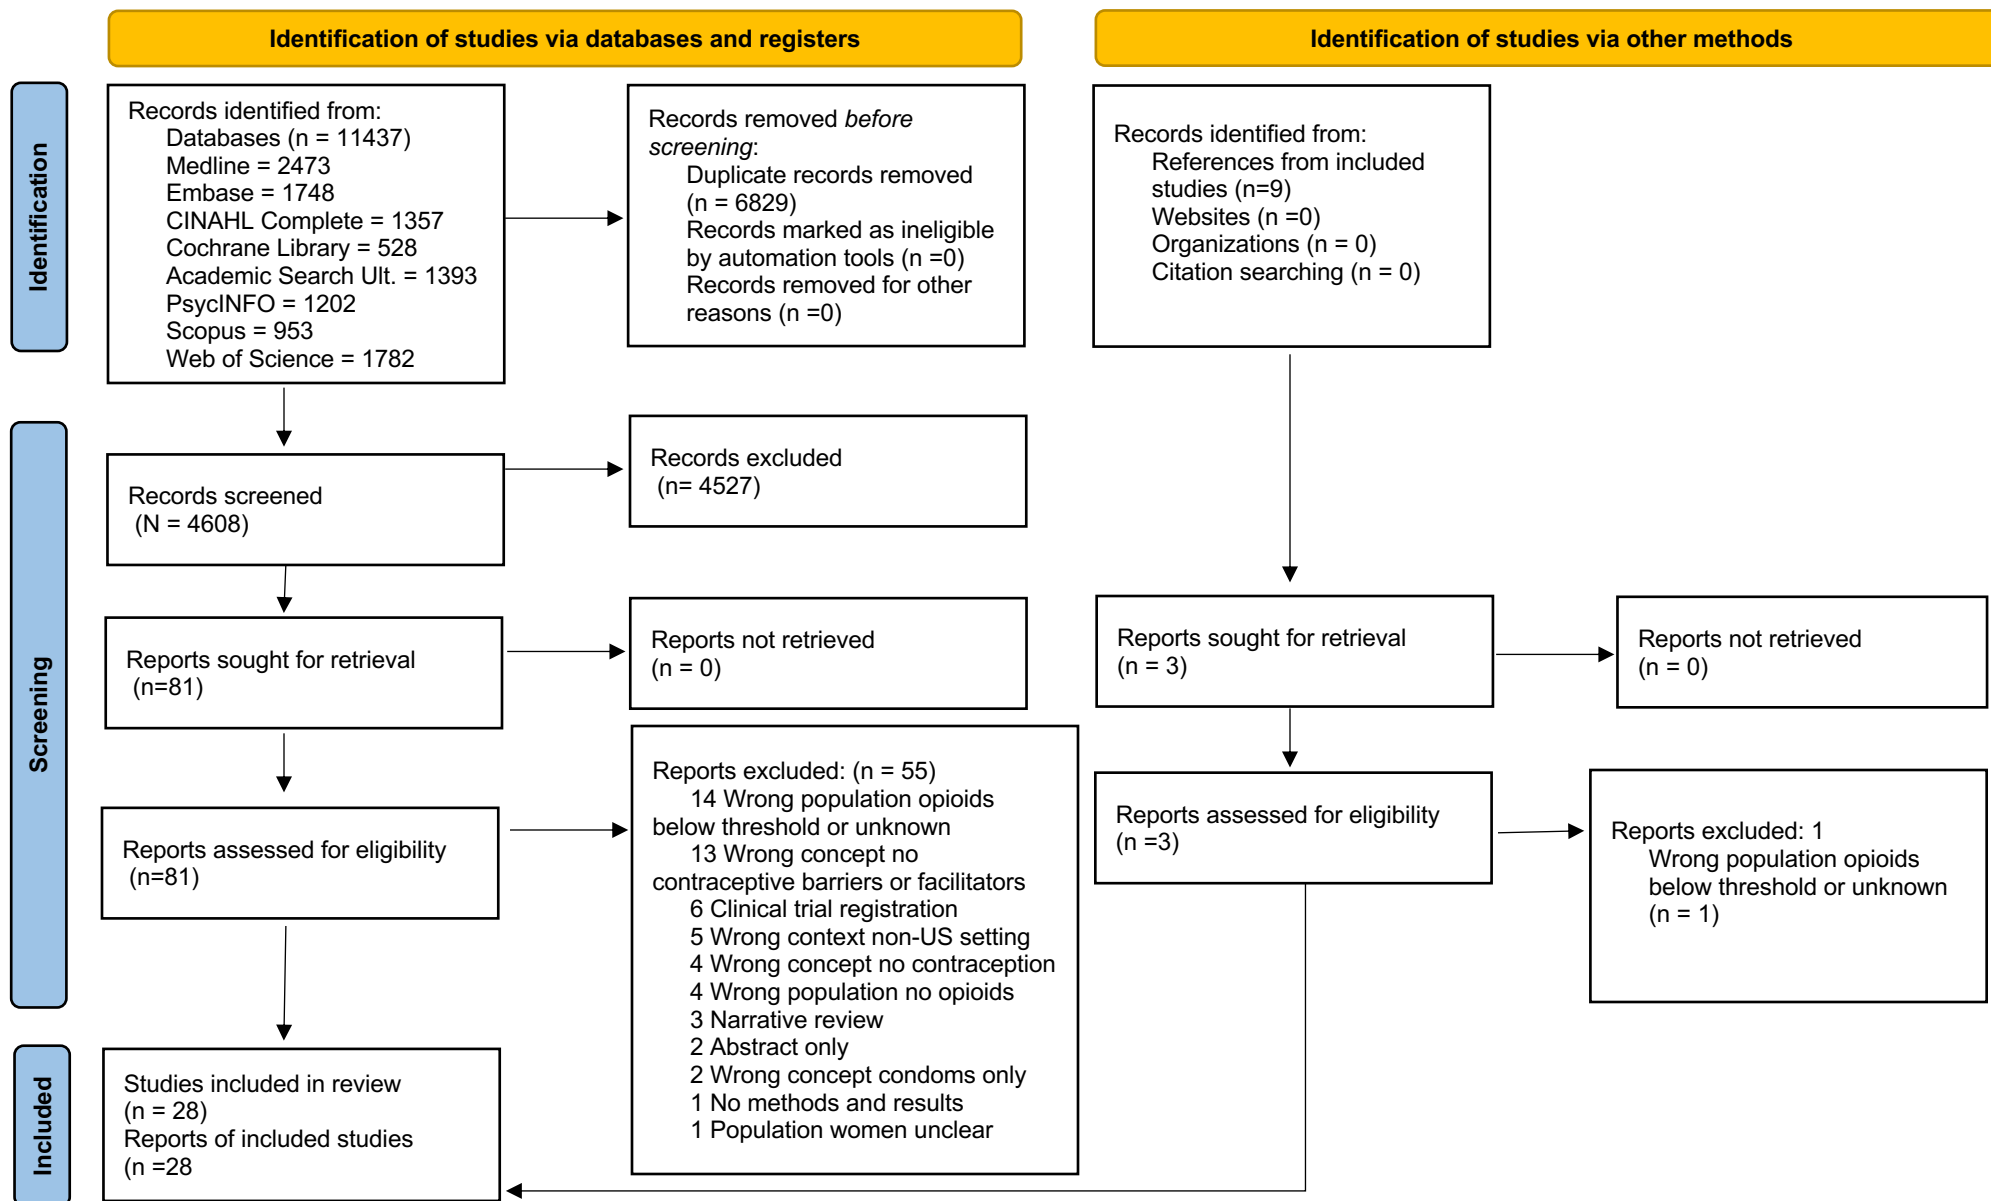

Source: Page MJ, McKenzie JE, Bossuyt PM, Boutron I, Hoffmann TC, et al. (2021) The PRISMA 2020 statement: an updated guideline for reporting systematic reviews. *BMJ* 372: n71.
